1 Proton-Dependent Inhibition, Inverted Voltage Activation, and  
2 Slow Gating of CLC-0 Chloride Channel

3

4 Hwoi Chan Kwon<sup>3</sup>, Yawei Yu<sup>4#</sup>, Robert H. Fairclough<sup>2,3,4</sup>, and Tsung-Yu Chen<sup>1,2,3,4\*</sup>

5

6 <sup>1</sup> Center for Neuroscience, University of California, Davis, California, United  
7 States of America

8 <sup>2</sup> Department of Neurology, University of California, Davis, California, United  
9 States of America

10 <sup>3</sup>Biophysics Graduate Program, University of California, Davis, California,  
11 United States of America

12 <sup>4</sup>BMCDG Graduate Program, University of California, Davis, California,  
13 United States of America

14

15 <sup>#</sup> Current Address: Department of Molecular Biology, University of California,  
16 Berkeley, California, United States of America

17

18 \*Corresponding Author:

19 E-mail: [tycchen@ucdavis.edu](mailto:tycchen@ucdavis.edu) (TC)

20

21 Short Title: Intracellular pH effect on CLC-0's slow gating

## 22 **Abstract**

23

24 CLC-0, a prototype Cl<sup>-</sup> channel in the CLC family, employs two gating mechanisms that control

25 its ion-permeation pore: fast gating and slow gating. The negatively-charged sidechain of a pore

26 glutamate residue, E166, is known to be the fast gate, and the swinging of this sidechain opens or closes

27 the pore of CLC-0 on the millisecond time scale. The other gating mechanism, slow gating, operates

28 with much slower kinetics in the range of seconds to tens or even hundreds of seconds, and it is thought

29 to involve still-unknown conformational rearrangements. Here, we find that low intracellular pH (pH<sub>i</sub>)

30 facilitates the closure of the CLC-0's slow gate, thus generating current inhibition. The rate of low pH<sub>i</sub>-

31 induced current inhibition increases with intracellular H<sup>+</sup> concentration ([H<sup>+</sup>]<sub>i</sub>)—the time constants of

32 current inhibition by low pH<sub>i</sub> = 4.5, 5.5 and 6 are roughly 0.1, 1 and 10 sec, respectively, at room

33 temperature. In comparison, the time constant of the slow gate closure at pH<sub>i</sub> = 7.4 at room temperature

34 is hundreds of seconds. The inhibition by low pH<sub>i</sub> is significantly less prominent in mutants favoring

35 the slow-gate open state (such as C212S and Y512A), further supporting the fact that intracellular H<sup>+</sup>

36 enhances the slow-gate closure in CLC-0. A fast inhibition by low pH<sub>i</sub> causes an apparent inverted

37 voltage-dependent activation in the wild-type CLC-0, a behavior similar to those in some channel

38 mutants such as V490W in which only membrane hyperpolarization can open the channel. Interestingly,

39 when V490W mutation is constructed in the background of C212S or Y512A mutation, the inverted

40 voltage-dependent activation disappears. We propose that the slow kinetics of CLC-0's slow-gate

41 closure may be due to low [H<sup>+</sup>]<sub>i</sub> rather than due to the proposed large conformational change of the

42 channel protein. Our results also suggest that the inverted voltage-dependent opening observed in some

43 mutant channels may result from fast closure of the slow gate by the mutations.

44 **KEYWORDS:** CLC-0, intracellular pH, gating, voltage dependence, chloride channel

## 45 **Introduction**

46  
47 The CLC channel/transporter family consists of transmembrane proteins of two functional  
48 categories: Cl<sup>-</sup> channels and Cl<sup>-</sup>/H<sup>+</sup> antiporters [1, 2]. These CLC proteins are expressed in various  
49 tissues to carry out critical physiological functions [3]. CLC-0, for example, is a Cl<sup>-</sup> channel expressed  
50 in *Torpedo* electroplax [4], and the *Torpedo* fish exploits CLC-0's function in the electric organ for  
51 building an under-water stun gun. CLC-1, CLC-2, and CLC-Ks are mammalian CLC channels  
52 important for normal functions of various organs, such as skeletal muscles, kidney, heart and brain  
53 [5-7]. On the other hand, several bacterial CLC molecules, such as CLC-ec1 [8], function as Cl<sup>-</sup>/H<sup>+</sup>  
54 antiporters [9], which enable bacteria to develop resistance to H<sup>+</sup> entry to the cells in very acidic  
55 environments [10]. Mammalian CLCs other than those mentioned above, such as CLC-5 [11], also  
56 function as Cl<sup>-</sup>/H<sup>+</sup> antiporters [12]. They are thought to be important in controlling the pH in the  
57 intracellular organelles, and mutations of these CLC proteins have been known to be associated with  
58 human hereditary diseases such as Dent's disease, osteomalacia, and lysosomal storage diseases [13-  
59 15].

60 It is known that all CLC members are homodimers [8, 16], and recent efforts have unveiled  
61 their molecular structures [17-22]. An example of the structure of a CLC protein most homologous to  
62 CLC-0 (i.e., CLC-1) is shown in Fig. 1 (PDB accessing code: 6QVU). Because of its well-characterized  
63 functional behaviors, CLC-0 is viewed as a prototype CLC molecule among CLC family members.  
64 Early single-channel recordings suggested the presence of two identical Cl<sup>-</sup>-conducting pores in CLC-  
65 0 [23-25], a double-barreled architecture later confirmed by CLC proteins' high-resolution structures.  
66 Two gating mechanisms have been identified in controlling the opening and closing of CLC-0: "fast  
67 gating" and "slow gating." Fast gating controls the two pores independently, and operates on the

68 millisecond time scale, while slow gating operates on the order of ~seconds to hundreds of seconds  
69 [26]. Because the slow-gating mechanism appears to control the two pores simultaneously, it is also  
70 called “common” gating, and the closure of the slow gate “inactivates” the channel. Based on single-  
71 channel behaviors of CLC-0, when the slow gate closes, Cl<sup>-</sup> conduction through the channel pores is  
72 shut, and the functional activities of the fast gate are not observable.

73

74 **FIGURE 1: Structure of vertebrate CLC channels.** Structure of human CLC-1 molecule  
75 (PDB accessing code: 6QVU) is used to represent the structure of CLC-0, which is still not  
76 available. CLC-0 residues mutated in this study are depicted by the colored and space-filled  
77 corresponding CLC-1 residues (in parenthesis): Blue, C212 (C277 of CLC-1); Grey, V490  
78 (I556); Green, Y512 (Y578). The “E-gate” residue, E166 of CLC-0 (E232 of CLC-1), is also  
79 shown as a space-filled residue (red). **(A)** Stereo-view of hCLC-1 structure viewed from within  
80 membrane phospholipids (side view). Curved arrows depict the ion permeation pathways. Dotted  
81 lines indicate the extracellular and intracellular edges of lipid membranes. **(B)** Stereo-view of  
82 hCLC-1 viewed from the cytosolic side.

83

84 Various studies in the literature have characterized CLC-0’s fast-gating details. It has been  
85 shown that Cl<sup>-</sup> in the extracellular and intracellular solutions both favor the opening of the fast gate of  
86 CLC-0 [27-29]. High-resolution CLC structures reveal three Cl<sup>-</sup>-binding sites in the ion-transport  
87 pathways of CLC proteins: the external ( $S_{\text{ext}}$ ), central ( $S_{\text{cen}}$ ) and internal sites ( $S_{\text{int}}$ ) [18]. However,  $S_{\text{ext}}$   
88 can also be occupied by the negatively charged sidechain of a glutamate residue (corresponding to E166  
89 in CLC-0), which is thought to be the fast gate (called E gate). Swinging this E-gate away from  $S_{\text{ext}}$  is

90 considered to be the fast-gate opening mechanism, and thus facilitating the fast-gate opening by Cl<sup>-</sup>  
91 could be due to a competition of Cl<sup>-</sup> with the E-gate [30-32]. Extracellular and intracellular low pH also  
92 favors fast-gate opening [33-36], presumably due to the protonation of the E-gate.

93         Compared to fast gating, the molecular mechanism of CLC-0's slow-gating is less defined  
94 despite being functionally characterized. Unlike the fast-gate opening, which is favored by membrane  
95 depolarization [24, 25, 27, 28], the voltage-dependence of slow-gate opening is opposite—the slow-  
96 gate's open probability ( $P_o^s$ ) decreases with membrane depolarization but increases with membrane  
97 hyperpolarization [37-39]. Cl<sup>-</sup> and H<sup>+</sup> also modulate CLC-0's slow gating [40, 41] and the slow gating  
98 is found to be very temperature-dependent [38, 39]. Because mutations at multiple sites on the channel  
99 protein alter the slow-gating [42-45], it has been thought that slow gating may involve a large protein  
100 conformational change, including relative movement of the two subunits at both the cytoplasmic and  
101 the transmembrane regions [43, 46].

102         Because defective functions of mammalian CLC channels underlie human diseases,  
103 understanding CLC channel's gating mechanisms is clinically relevant. For example, CLC-1  
104 channelopathy causes a hereditary muscle disease, myotonia congenita. The myotonia pathophysiology  
105 is rationalized from the fact that CLC-1 constitutes 50-70 % of the resting muscle conductance and thus  
106 is critical for controlling sarcolemmal potential [47]. Similar to CLC-0, membrane depolarization  
107 favors the opening of CLC-1. A defect in the CLC-1 opening by depolarizing voltage therefore renders  
108 it difficult to bring the membrane potential back to the resting level after firing action potentials [48],  
109 thus generating a myotonia condition. Indeed, some CLC-1 myotonia mutants are opened by membrane  
110 hyperpolarization but not by depolarization [49, 50]. Such an inverted voltage dependence of channel  
111 opening also occurs in mutants of CLC-0. Using a voltage protocol shown in Fig. 2 A, for example, the  
112 voltage-dependent opening of wild-type (WT) CLC-0 and that of a point mutant, V490W, are compared

113 in Fig. 2 B, where the current of the V490W mutant is activated by membrane hyperpolarization but  
114 not by depolarization. Interestingly, we discover that such a hyperpolarization-induced channel opening  
115 can also occur in WT CLC-0 in the presence of low  $pH_i$  (Fig. 2 C). In this paper, we study the relation  
116 between the inverted voltage-dependent channel opening and the intracellular  $H^+$  effect on the slow  
117 gating in CLC-0.

118

119 **FIGURE 2: Voltage dependence of current activation of WT and mutant CLC-0. (A)**

120 Voltage protocol (protocol I) for recordings. A full protocol consists of 12 recording sweeps.

121 One sweep includes a prepulse voltage step at +60 mV (50 ms) followed by one of the various

122 test voltage steps (70 ms) from +60 mV to -160 mV in -20 mV voltage steps, and followed by a

123 tail voltage step of 50 ms at 0 mV (colored in black) or -100 mV (colored in red). The voltage

124 of the inter-sweep interval (ISI) was 0 mV and the duration was 1 or 4 sec. **(B)** Activation of WT

125 CLC-0 and V490W mutant at  $pH_i = 7.4$ , using the voltage protocol shown in A. ISI was 4 sec.

126 Dash line: zero-current level. Notice the inverted voltage-dependent activation in the mutant. **(C)**

127 Activation of WT CLC-0 at  $pH_i = 5.5$ . ISI's are 4 and 1 sec for the recording on the left and right,

128 respectively. Notice the inverted voltage activation of WT CLC-0 in low  $pH_i$ .

129

130

131

132 **Materials and methods**

133 **Mutagenesis and channel expression**

134 The cDNAs of the WT CLC-0 and various mutants of CLC-0 were subcloned in the pIRES2-  
135 EGFP vector containing internal ribosome entry sites (IRES) and enhanced green fluorescent protein  
136 (EGFP). Mutagenesis was made using the Quick Change site-directed mutagenesis kit (Stratagene),  
137 and the mutations were confirmed via commercially available sequencing services. All cDNAs were  
138 transfected into the human embryonic kidney 293 (HEK293) cells grown in Dulbecco's modified  
139 Eagle's medium (DMEM) supplemented with 10% fetal bovine serum (FBS) and 1%  
140 Penicillin/streptomycin. The transfections were performed using commercially available  
141 Lipofectamine 3000 kit (Invitrogen) following the standard protocol provided by the vendor. After  
142 transfections, cells were incubated in 37 °C and 5% CO<sub>2</sub> for 1-2 days before conducting experiments.

143

## 144 **Electrophysiological Recordings**

145 Transfected HEK293 cells were identified by the green fluorescence under the Leitz DM IRB  
146 inverted microscope (Leica) equipped with GFP filter (Chroma Technology) and the XT640-W LED  
147 light source (Lumen Dynamics). Inside-out membrane patches were excised from the green  
148 fluorescence-positive cells, and voltage-clamp experiments were conducted using the Axopatch 200B  
149 amplifier (Axon Instruments/Molecular Devices). The recorded signals were filtered at 2 kHz and were  
150 digitized at 4 kHz using Digidata 1440A digitizing board (Molecular Devices/Axon Instruments).  
151 Occasionally, the 50/60 Hz noise signal was removed using Hum Bug 50/60 Hz eliminator (Quest  
152 Scientific). Recording pipettes were fabricated from the TW150-6 borosilicate glass capillaries (World  
153 Precision Instruments Inc.) using the pp830 vertical puller (Narishige International). The electrode  
154 resistance was normally ~ 2-3 MΩ when filled with the pipette (extracellular) solution containing 130  
155 mM NaCl, 5 mM MgCl<sub>2</sub>, 10 mM HEPES, 1 mM EGTA, with the pH adjusted to 7.4. The intracellular

156 solution is the same as the extracellular solution except that 10 mM MES was used as the pH buffer  
157 when  $\text{pH} \leq 6.2$ .

158 Fast solution exchange was achieved using the SF-77B solution exchanger (Warner  
159 Instruments/Harvard apparatus). Although the time for crossing the laminar flow barrier is estimated  
160 to be several ms (Zhang et al., 2009), there is always a latency time of 20-50 ms due to the time lag in  
161 initiating the crossing. Therefore, time constants of less than 50 ms estimated from a current relaxation  
162 following a change of  $\text{pH}_i$  were considered less accurate. Most of the experiments were performed at  
163 room temperature (21-22 °C). When a higher temperature was required, the solutions in the 10 ml  
164 syringe reservoirs were raised to a constant higher temperature using the SW-10/6 multi-syringe  
165 warmer alongside with the TC-324B controller (Warner instruments/Harvard Apparatus). The  
166 temperature of the solution, however, dropped when it was flowing through the PE50 tubing and finally  
167 exited out of the SF-77 barrel tip where the solution meets the excised inside-out patch. The reported  
168 temperatures in this study were those recorded by a thermistor placed at the outlet of the SF-77 solution  
169 delivery barrel after every recording experiment. It should be emphasized that such a temperature  
170 control was not optimal, and the temperature variation can be up to 1-2 °C based on the variation among  
171 multiple measurements with the same solution temperature in the syringe reservoir.

172

## 173 **Experimental protocols and Data Analyses**

174 Because the slow-gate opening of CLC-0 tends to be minimal at voltages of the resting  
175 membrane potential of HEK293 cells or above (Chen 1998), WT CLC-0 was partially inactivated when  
176 membrane patches were excised. To activate the current of CLC-0 for experiments, five 50-ms pulses  
177 of -100 mV at 1 Hz were applied to all patches expressing WT CLC-0 before starting any experiment.



178 The procedure was repeated multiple times until the slow gate was maximally opened (based on the  
179 observation that the recorded current was no longer increased by this current-activation procedure). For  
180 mutants with a mostly open slow-gate (such as C212S or Y512A) no such current activation procedure  
181 was necessary.

182 Three types of experimental protocols were employed for the experiments presented in this  
183 paper. Protocol I was used for evaluating the quasi steady-state voltage-dependent current activation.  
184 Each recording sweep in this protocol has a total time of 170 ms, consisting of a +60 mV pre-pulse  
185 voltage step for 50 ms, followed by a test voltage step (from +60 mV to -160 mV in a series of -20 mV  
186 voltage steps) for 70 ms, and finally a tail voltage (at 0 mV or -100 mV) for 50 ms. The inter-sweep  
187 interval (ISI), namely, the time between the end of one recording sweep to the beginning of next sweep  
188 was 1 sec or 4 sec. Membrane voltage of ISI was at 0 mV. When this experimental protocol with a -  
189 100 mV tail-voltage was employed, analyzing the initial tail current (obtained at the beginning of the -  
190 100 mV tail voltage step) provides an estimate of the relative open probability ( $P_o$ ) of the channel [43].  
191 In WT CLC-0 recordings, the largest initial tail current (negative current) occurred in the recording  
192 sweep with the +60 mV test voltage step because the overall channel opening is favored by membrane  
193 depolarization. On the other hand, for the mutant activated by membrane hyperpolarization (such as  
194 V490W), the largest tail current was observed in the recording sweep with the -160 mV test voltage  
195 [43]. In either case, the tail-current relaxation process was fitted to a single-exponential function, and  
196 the initial tail current from each recording sweep was determined by extrapolating the exponential tail  
197 current relaxation to the beginning of the tail voltage step. The initial tail currents from all recording  
198 sweeps were normalized to the maximal initial tail current, which represents a relative  $P_o$  of the channel  
199 at the end of the test voltages (relative to the  $P_o$  at the most positive voltage in the WT CLC-0 or to the

200 most negative voltage in the mutant V490W). Plotting the relative  $P_o$  as a function of the test voltages  
201 illustrates the voltage dependence of the channel activation.

202 To evaluate the process of the change of  $Cl^-$  current upon reducing  $pH_i$ , we employed a voltage  
203 protocol (protocol II) containing a voltage step of +60 mV (50 ms) followed by a tail voltage step at -  
204 100 mV for 70 ms. Such a voltage protocol was used to mimic the experimental protocol of the previous  
205 studies using whole cell recording methods on channels expressed in *Xenopus* oocytes [38, 39]. To  
206 present the experimental results, the current at the +60 mV voltage step was measured and plotted  
207 against the time of the recording. ISI, which was either 1 or 4 sec, also refers to the time interval  
208 between the end of one recording sweep and the beginning of the following sweep. The membrane  
209 voltage at the ISI in this protocol was also 0 mV.

210 The third voltage protocol (protocol III), like protocol II, was also used to assess the current  
211 inhibition process after applying a high  $[H^+]_i$  except that the application and removal of the low  $pH_i$   
212 solution was conducted at a constant membrane voltage. For these experiments, the membrane voltages  
213 ranged from +60 mV to -60 mV. However, experiments with a slow inhibition process (in relatively  
214 high  $pH_i$  conditions such as  $pH_i = 5.5$  or 6) at some negative voltages were technically difficult due to  
215 stability problems of the excised patches. Estimates of the time constant of such slow inhibition  
216 processes may thus be less precise.

217 Protocol II & III were used for studying the kinetics of the current relaxation process followed by  
218 the  $pH_i$  perturbation. Both protocols started from a steady-state current level at  $pH_i = 7.4$ . A lower  $pH_i$   
219 solution was then applied, and the current was inhibited to different degrees at different speeds  
220 depending on  $pH_i$  (or  $[H^+]_i$ ). After the current reached a steady state,  $pH_i$  was changed back to 7.4 and  
221 the current may or may not recover. The current relaxation process (current inhibition or current  
222 recovery) was then fitted to a single-exponential function to obtain the time constant of current

223 inhibition ( $\tau_{inh}$ ) and the time constant of current recovery ( $\tau_{rec}$ ). However, for recordings of the WT  
224 CLC-0, current recovery was observed only at negative membrane voltages but not at the positive  
225 membrane voltages.

226

227

228

229

## 230 **Results**

231 The fast and the slow gating of CLC-0 have opposite voltage dependence. Membrane  
232 depolarization increases the fast-gate open probability ( $P_o^f$ ) but reduces the slow-gate  $P_o$  ( $P_o^s$ ). Using  
233 protocol I (Fig. 2 A) in which the duration of a recording sweep is less than 0.2 sec, the change of  $P_o^s$   
234 of CLC-0, due to its very slow kinetics (tens to hundreds of seconds at room temperature), does not  
235 result in a dramatic current change in such a short time frame. Therefore, the change of the WT CLC-  
236 0 current shown in Fig. 2 B (left panel) mostly reflects the activities of the fast gating. When the  
237 membrane voltage is at 0 mV or above,  $P_o^f$  of CLC-0 is maximal ( $P_o^f \sim 1$ ) [25, 28, 44, 51]. Therefore,  
238 the instantaneous current jump upon a change of the voltage is due to the change of the driving force  
239 rather than an alteration of channel's  $P_o^f$ . On the other hand, when membrane voltage is hyperpolarized,  
240  $P_o^f$  is reduced, and a current reduction with a deactivation time constant of several milliseconds is  
241 observed (Fig. 2 B, left panel). The current deactivation at hyperpolarization voltages reflects a  
242 reduction of  $P_o^f$ , with a kinetics in the millisecond time range.

243 In some mutant channels of CLC-0, such a normal voltage dependence of channel opening is  
244 inverted. For example, using the same voltage protocol I (Fig. 2 A), WT CLC-0 (Fig. 2 B, left panel)  
245 and the V490W mutant (Fig. 2 B, right panel), have opposite voltage dependence for current activation  
246 [43]. In the V490W mutant, little current is observed at voltages  $> 0$  mV, while membrane  
247 hyperpolarization activates the current. Thus, membrane hyperpolarization but not depolarization  
248 favors the opening of this mutant channel. Interestingly, when  $\text{pH}_i$  is reduced, even a WT CLC-0  
249 channel can exhibit such an inverted voltage-dependent channel activation. Fig. 2 C shows that at  $\text{pH}_i$   
250  $= 5.5$ , voltage steps above 0 mV activate little current in WT CLC-0, while membrane hyperpolarization  
251 induces current similar to that observed in the V490W mutant at a neutral  $\text{pH}_i$ .

252 When protocol I was used to activate the current of WT CLC-0 at low  $\text{pH}_i$ , the duration of the  
253 inter-sweep interval (ISI) (where the membrane voltage was held at 0 mV) played an important role for  
254 the amplitude of the activated current. This can be observed by comparing the two recordings of WT  
255 CLC-0 at  $\text{pH}_i = 5.5$  obtained with the same voltage protocol (protocol I) but different ISI durations: 4  
256 sec *versus* 1 sec (Fig. 2 C left and the right panels, respectively). Comparing the current at the +60 mV  
257 pre-pulse voltage step, the recording with 4-sec ISI (left panel) shows little outward current while the  
258 pre-pulse current in the recording with 1-sec ISI retains some outward current. The difference in the  
259 outward current between these recordings is also reflected by the instantaneous inward current when  
260 the membrane voltage is changed from +60 mV pre-pulse voltage step to the various hyperpolarizing  
261 voltage steps. It should be noted that the current at the +60 mV pre-pulse voltage depends on the channel  
262 conductance at the end of the ISI following the previous recording sweep. We suspected that  
263 intracellular  $\text{H}^+$  may inhibit the current of WT CLC-0 at the 0-mV holding voltage during ISI. Therefore,  
264 in a recording with 4-sec ISI, the channel conductance (after being activated by membrane  
265 hyperpolarization) was nearly completely inhibited by  $\text{H}^+$ . On the other hand, with 1-sec ISI, the

266 hyperpolarization-activated conductance has not been completely inhibited before starting the  
267 following recording sweep.

268 To confirm this speculation, we employed a continuous recording protocol, in which a sweep  
269 of recording contains only a +60 mV voltage step for 50 ms followed by a negative tail voltage step of  
270 -100 mV for 70 ms (protocol II, Fig. 3 A). The holding voltage at ISI was 0 mV. Typical experiments  
271 are shown in Fig. 3 B & C, where the ISI is 4 and 1 sec, respectively. These experiments started with a  
272 steady-state recording at  $\text{pH}_i = 7.4$ . An acidic intracellular solution ( $\text{pH}_i = 5$  in these two experiments)  
273 was then applied, followed by a switch of solutions back to  $\text{pH}_i = 7.4$ . Each circle in Figs. 3 B & C  
274 represents the outward current measured at the end of +60 mV voltage step. These experiments show  
275 that the outward current in the recording with ISI = 4 sec (Fig. 3 B) is inhibited almost completely while  
276 the recording with ISI = 1 sec (Fig. 3 C) still retains significant outward current.

277

278 **FIGURE 3: Inhibition of WT CLC-0 by intracellular  $\text{H}^+$ .** (A) Voltage protocol (protocol II)  
279 used for the experiments. (B & C) Inhibition of the CLC-0 current by an intracellular acidic  
280 solution ( $\text{pH}_i = 5$ ). Circles represent the current measured at the end of the +60 mV voltage step  
281 (downward arrows shown in A). ISI = 4 s and 1 s for the experiments in B and C, respectively.  
282 Notice the incomplete inhibition when ISI = 1 sec. Insets show recording traces at indicated time  
283 points.

284

285 The recordings in Figs. 3 B & C also show that the low  $\text{pH}_i$ -induced current inhibition of WT  
286 CLC-0 appears to follow an exponentially decaying process. To empirically evaluate the kinetics of the  
287 current inhibition by intracellular  $\text{H}^+$ , we fit the processes of the low  $\text{pH}_i$ -induced current inhibition and

288 the current recovery upon removing low  $\text{pH}_i$  with single-exponential function (Fig. 4 A). The time  
289 constants of the current inhibition ( $\tau_{\text{inh}}$ ) and those of the current recovery ( $\tau_{\text{rec}}$ ) are plotted against the  
290 values of  $\text{pH}_i$  (and also  $[\text{H}^+]_i$ ) used for inhibiting the current. Fig. 4 B shows that  $\tau_{\text{inh}}$  is  $\text{pH}_i$ -dependent:  
291 the higher the  $[\text{H}^+]_i$ , the smaller the value of  $\tau_{\text{inh}}$  (namely, the faster the inhibition). The values of  $\tau_{\text{rec}}$   
292 remain the same in all experiments in Fig. 4 A because they reflect the current recovery to the same  
293 final  $\text{pH}_i$  (namely, 7.4).

294

295 **FIGURE 4: Kinetics of the current inhibition and recovery of WT CLC-0 upon switching**  
296  **$\text{pH}_i$ .** Voltage protocol was as that shown in Fig. 3 A. All currents measured at +60 mV were  
297 normalized to that obtained right before the application of low  $\text{pH}_i$  solutions. **(A)** Inhibition of  
298 WT CLC-0 currents by various low  $\text{pH}_i$  solutions. ISI = 4 s. The numbers above the horizontal  
299 lines (teal and red colors) indicate the values of  $\text{pH}_i$ . **(B)** Time constants of the inhibition (red  
300 squares) plotted against the values of  $\text{pH}_i$  (and thus  $[\text{H}^+]_i$ ). Results were obtained from recordings  
301 like those shown in A. Time constants of current recovery (at  $\text{pH}_i = 7.4$ ) are also plotted (sea  
302 green circles).

303

304 The experiments in Figs. 3 and 4 were conducted using protocol II with a negative tail voltage  
305 step (at -100 mV) which activates the current of WT CLC-0 at low  $\text{pH}_i$ . Assessing the effects of  
306 membrane voltages on the kinetics of current inhibition and recovery was therefore not accurate. We  
307 thus employed a different experimental protocol, namely, altering  $\text{pH}_i$  at constant voltages (protocol  
308 III). In such experiments (Fig. 5 A), the current inhibition can still be reasonably fit to a single-  
309 exponential function. Nonetheless, no current recovery was observed after switching back to the

310 solution with  $\text{pH}_i = 7.4$  when the experiment was performed at positive voltages. In comparison with  
311 the results obtained with protocol II (Fig. 4), the experiments using protocol III generate a faster current  
312 inhibition and a slower current recovery (namely,  $\tau_{\text{inh}}$ , is smaller while  $\tau_{\text{rec}}$ , is larger). In addition, like  
313 those experiments in Fig. 4,  $\tau_{\text{inh}}$  from using protocol III also strongly depends on  $[\text{H}^+]_i$  (Fig. 5 B) but  
314 not on membrane voltages (Fig. 5 C). On the other hand, membrane voltages affect the current recovery  
315 significantly in that the more hyperpolarized the membrane voltage, the smaller the value of  $\tau_{\text{rec}}$  (namely,  
316 the faster the current recovery rate) (Fig. 5 D).

317

318 **FIGURE 5: Kinetic analyses of current inhibition and recovery of the  $\text{H}^+$ -induced WT CLC-**  
319 **0 inhibition.** Experiments were performed with protocol III on excised inside-out patches.  
320 Voltages were held constant throughout the recording sweep during which the intracellular  
321 solutions with different pH were switched. **(A)** Current inhibition and recovery at  $\pm 40$  mV. The  
322 numbers above the dashed horizontal lines (red and sea green colors) indicate the values of  $\text{pH}_i$ .  
323 Fitted exponential decay curves (red) are superimposed with the recording traces in black. **(B)**  
324 Time constants of inhibition at three voltages ( $\tau_{\text{inh}}$ ) plotted against  $[\text{H}^+]_i$  (or  $\text{pH}_i$ ). The time constant  
325 of the slow-gate closure at  $\text{pH}_i = 7.4$  at room temperature (measured separately) is shown by open  
326 square in sea green color. **(C)** Voltage dependence of the inhibition time constant ( $\tau_{\text{inh}}$ ). **(D)** Current  
327 recovery time constants ( $\tau_{\text{rec}}$ ) against membrane voltages.

328

329 It is interesting to note that extrapolating the value of  $\tau_{\text{inh}}$  to a neutral  $\text{pH}_i$  gives a  $\tau_{\text{inh}}$  value of  
330 hundreds of sec (Fig. 5 B), which is similar to the relaxation time constant of the CLC-0 slow-gate  
331 closure at  $\text{pH}_i = 7.4$  [38, 39]. This observation suggests an intimate relation between the inhibition of

332 CLC-0 by intracellular  $H^+$  and the closure of CLC-0's slow gate. To test this possibility, we examine  
333 the intracellular  $H^+$  inhibition on C212S, a point mutant of CLC-0 in which the slow gate appears to be  
334 mostly open [44]. Fig. 6 A & B illustrate the inhibition of WT CLC-0 and C212S by  $pH_i$  of 5.5 and 4.5,  
335 respectively, while the steady-state dose-dependent  $H^+$  inhibitions between WT CLC-0 and C212S are  
336 compared in Fig. 6 C. From this graph, it can be clearly observed that intracellular  $H^+$  exerts a much  
337 weaker inhibitory effect on the C212S mutant than on WT CLC-0.

338

339 **FIGURE 6. Comparison of low  $pH_i$ -induced inhibitions between WT CLC-0 and the C212S**  
340 **mutant. (A)** Current inhibition of WT CLC-0 and C212S mutant at +20 mV by  $pH_i = 5.5$ . **(B)**  
341 Current inhibition of WT CLC-0 and C212S mutant at +20 mV by  $pH_i = 4.5$ . **(C)** Remaining  
342 current fraction ( $I/I_{max}$ ) of WT CLC-0 and C212S mutant against  $[H^+]_i$  (or  $pH_i$ ). The steady-state  
343 current ( $I$ ) was measured, respectively, at 5 s and 3 s (indicated by wine-colored arrows in A &  
344 B, respectively) after applying the  $pH_i$  5.5 and  $pH_i$  4.5 solutions.  $I_{max}$  was the current measured  
345 immediately before the low- $pH_i$  solution was applied (teal color arrows in A & B).

346

347 It has also been well documented that the temperature dependence of the slow gating in WT  
348 CLC-0 is significant [38, 39], while that in C212S is weak [44]. The recording traces in Fig. 7 A show  
349 that the kinetics of the current inhibition by a low  $pH_i$  (in this case,  $pH_i = 5.5$ ) is sensitive to temperature  
350 in WT CLC-0. To test the temperature dependence of low  $pH_i$ -induced inhibitions in the C212S mutant  
351 (Fig. 7 B),  $pH_i = 4.5$  was used because this mutant channel is much less sensitive to  $H^+$  inhibition.  
352 Visual inspection of the three recording traces indicates that the temperature dependence of the low  
353  $pH_i$ -induced inhibition in C212S is weak. The averaged results shown in Fig. 7 C reveal a large



354 difference of the temperature dependence of  $\tau_{inh}$  between WT CLC-0 and the C212S mutant. In Fig. 8  
355 A, the process of the current inhibition by  $pH_i = 4.5$  (pink area) and the process of current recovery  
356 upon removing high  $[H^+]_i$  (light blue area) for WT CLC-0 and the C212S mutant are illustrated. The  
357 voltage dependence of the averaged values of  $\tau_{inh}$  between WT CLC-0 and the C212S mutant are  
358 compared in Fig. 8 B, while the comparison of those of  $\tau_{rec}$  are illustrated in Fig. 8 C. In CLC-0, it is  
359  $\tau_{rec}$  but not  $\tau_{inh}$  that is voltage dependent—the more negative the membrane voltage, the smaller the  
360 value of  $\tau_{rec}$  (namely, the faster the recovery from the inhibition). In C212S, a  $[H^+]_i < 1 \mu M$  (namely  
361  $pH_i > 6$ ) generates very little inhibition (Fig. 6), so it is technically necessary to employ very low  $pH_i$   
362 (4-5) to generate inhibition for the experiments. The value of  $\tau_{inh}$  is small (fast current inhibition) likely  
363 because of the high  $[H^+]_i$  at  $pH_i = 4.5$ . Interestingly,  $\tau_{rec}$  is also small in C212S, reflecting a faster current  
364 recovery process than that in WT CLC-0. Fig. 8 B & C show that the voltage dependence of  $\tau_{inh}$  and  
365  $\tau_{rec}$  are both weak for the C212S mutant.

366

367 **FIGURE 7: Comparing the temperature dependence of low  $pH_i$ -induced inhibitions**  
368 **between WT CLC-0 and the C212S mutant. (A)** Inhibitions of WT CLC-0 by a solution with  
369  $pH_i = 5.5$  at three temperatures. **(B)** Inhibitions of the C212S mutant by a solution with  $pH_i =$   
370 4.5. All recording traces in A & B were obtained at  $V_m = \pm 20$  mV. **(C)** Time constants of  $H^+$   
371 inhibition of WT CLC-0 and the C212S mutant plotted against temperature.

372

373 **FIGURE 8. Comparing the voltage dependence of low  $pH_i$ -induced inhibition between WT**  
374 **CLC-0 and the C212S mutant. (A)** Recording traces showing the current inhibition induced by  
375 a solution with  $pH_i = 4.5$  in WT CLC-0 and C212S.  $V_m = -40$  mV. Values of the  $pH_i$  were shown

376 below the colored horizontal lines. The values of  $\tau_{\text{inh}}$  and  $\tau_{\text{rec}}$  were obtained by fitting the current  
377 inhibition process (region shaded in pink color) and the current recovery process (region shaded  
378 in light blue) to single-exponential functions. **(B)** Voltage dependence of  $\tau_{\text{inh}}$  of WT CLC-0 and  
379 C212S. All data points were obtained from the inhibition induced by a solution with  $\text{pH}_i = 4.5$ .  
380 **(C)** Voltage dependence of  $\tau_{\text{rec}}$  of WT CLC-0 and C212S after  $\text{pH}_i = 4.5$  was switched back to  
381  $\text{pH}_i = 7.4$ . At positive voltages, current recovery was observed in the C212S mutant but not in  
382 WT CLC-0.

383  
384 If the lower sensitivity to intracellular  $\text{H}^+$  inhibition in C212S is due to a reduced slow-gate  
385 closure in this mutant, other mutations that also prevent the channel from closing the slow gate may  
386 exhibit similar low sensitivity to intracellular  $\text{H}^+$  inhibition. In Fig. 9 A, we compare the inhibition by  
387 low  $\text{pH}_i$  solutions ( $\text{pH}_i = 5.5$  and  $4.5$  in the upper and lower panel, respectively) between WT CLC-0  
388 and another mutant, Y512A, which has also been shown to largely prevent the slow gate from closing  
389 [45]. The steady-state  $[\text{H}^+]_i$ -dependent current inhibition in Fig. 9 B indeed shows that the mutant  
390 Y512A, like C212S, is also more resistant to the intracellular  $\text{H}^+$  inhibition than WT CLC-0.

391  
392 **FIGURE 9: Correcting the inverted voltage-dependent opening in the V490W mutant by**  
393 **mutations that inhibit slow-gate closure. (A)** Comparing the inhibitions of WT CLC-0 and the  
394 Y512A mutant by solutions with  $\text{pH}_i = 5.5$  (upper panel) and  $4.5$  (lower panel). **(B)** Remaining  
395 current fractions of WT CLC-0 and the Y512A mutant after the current inhibition by various  
396  $[\text{H}^+]_i$ . **(C)** Recording traces of the double mutants V490W/C212S (left) and V490W/Y512A  
397 (right) obtained using the experimental protocol I with the tail step voltage at  $-100$  mV. In both

398 recordings,  $\text{pH}_i = 7.4$ . **(D)** Relative  $P_o$  of WT CLC-0, three mutants, C212S, V490W/C212S and  
399 V490W/Y512A. All data were obtained at  $\text{pH}_i = 7.4$ .

400

401 On the other hand, if the inverted voltage dependent opening of the V490W mutant is due to  
402 an excessive slow-gate closure in neutral  $\text{pH}_i$ , the C212S mutation or the Y512A mutation may reduce  
403 the excessive slow-gate closure caused by the V490W mutation. In Fig. 9 C, we show the recording  
404 traces of two double mutants, V490W/C212S and V490W/Y512A, at  $\text{pH}_i = 7.4$ , using the voltage protocol  
405 I shown in Fig. 2 A. In Fig. 9 D, we plot the normalized instantaneous tailed currents of WT CLC-0  
406 (black solid squares), V490W (red circles), the V490W/C212S mutant (triangles), and the  
407 V490W/Y512A mutant (diamonds) obtained from recordings at  $\text{pH}_i = 7.4$ . It can be seen that the  
408 inverted voltage-dependent opening in the V490W mutant disappears in both the V490W/C212S and  
409 V490W/Y512A double mutants. The voltage dependent opening of these two double mutants looks  
410 very similar to that of WT CLC-0. These results suggest that the inverted voltage dependent opening  
411 of the V490W mutant may be due to an excessive slow-gate closure at the neutral  $\text{pH}_i$ .

412

413

414

415

## 416 **Discussion**

417 The two types of CLC family members,  $\text{Cl}^-$  channels (such as CLC-0, CLC-1, CLC-2 and CLC-  
418 Ks) and  $\text{Cl}^-/\text{H}^+$  antiporters (such as bacterial CLCs and mammalian CLCs expressed in intracellular

419 organelles), are structurally similar to each other [17-22], so the gating mechanisms of CLC Cl<sup>-</sup>  
420 channels are thought to be driven by a background Cl<sup>-</sup>/H<sup>+</sup> antiporter activity [52]. Indeed, a change of  
421 pH close to the cell membrane has been demonstrated during the opening and closing of CLC channels  
422 [12]. In CLC-0, Cl<sup>-</sup> and H<sup>+</sup> both increase P<sub>o</sub><sup>f</sup> [27, 28, 35, 36]. Mechanistically, protonation of the E-  
423 gate is thought to help swing the fast gate away from the pore while Cl<sup>-</sup> competes with the E-gate for  
424 the Cl<sup>-</sup> binding site S<sub>ext</sub>. On the other hand, the molecular mechanism of slow gating of CLC-0 remains  
425 a mystery. At the single-channel level, Richard and Miller [40] discovered a “non-equilibrium” gating  
426 cycle for CLC-0’s slow gating. The phenomenon involves an asymmetry in the transitions between the  
427 slow-gate open state and the inactivation state: the channels are more likely to enter the inactivation  
428 state from the one-pore open state while leaving the inactivation state to the two-pore open state. They  
429 demonstrated that this non-equilibrium gating is facilitated by a transmembrane Cl<sup>-</sup> flux. Later  
430 experiments by Lisal and Maduke [41] discovered that the H<sup>+</sup> gradient across the membrane may be an  
431 even more powerful energy source to promote this non-equilibrium gating. The structural-functional  
432 basis underlying these findings of non-equilibrium gating remains unsolved.

433         The results from our present work reveal a potent inhibitory effect on CLC-0 currents by  
434 intracellular H<sup>+</sup>. An intracellular solution with pH<sub>i</sub> = 6 ([H<sup>+</sup>]<sub>i</sub> = 1 μM) inhibits the steady-state current  
435 of the WT channel by ~50 % (Fig. 6 C). However, the kinetics of the H<sup>+</sup>-induced inhibition is slow.  
436 Hence, we suspected that the inhibition of CLC-0 by intracellular H<sup>+</sup> is related to the slow-gate closure.  
437 The dependence of this H<sup>+</sup> inhibition on membrane voltage and temperature is also consistent with the  
438 properties of CLC-0’s slow gating—the more negative the membrane voltage, the faster the current  
439 recovery from the inhibition [53], and the higher the temperature, the faster the inhibition relaxation  
440 kinetics [38, 39]. Furthermore, inhibition effects by intracellular H<sup>+</sup> on the C212S and Y512A mutants,  
441 in which the slow gates are mostly open [44, 45], were much weaker than that on the WT CLC-0. These

442 findings indicate that intracellular  $H^+$  enhances the closure of the slow gate of CLC-0, thus generating  
443 the current inhibition.

444         So far, most of the proposed slow-gating mechanisms of CLC-0 are vague. For example, a  
445 conformational change of the channel has been suggested to be involved in the slow-gating mechanism  
446 of CLC-0 [43, 46]. Yet, it is not known what exact conformational change is and whether the speculated  
447 conformational change is causally involved in the slow gating. A more specific slow-gate closing  
448 mechanism was recently proposed by Bennetts and Parker [45]. Based on the observation that the slow-  
449 gate closure appears not present in the Y512A mutant of CLC-0, they proposed a “pincer” occlusion  
450 near  $S_{cen}$  as the slow-gate closing mechanism, where the carboxylate of the E-gate (E166 in CLC-0)  
451 forms a hydrogen bond with the phenolic hydroxyl group of a tyrosine residue (Y512 in CLC-0).  
452 However, as Jentsch and Pusch point out in their recent review [1], such interaction is not possible  
453 because manipulation of the corresponding tyrosine residue in another CLC channel homologue, CLC-  
454 K (Y520A mutation in CLC-K), still produces a similar gating change [54]. While lacking the gating  
455 glutamate, CLC-K instead has a valine residue at the equivalent position of E166 of CLC-0.  
456 Furthermore, the proposal of Bennetts and Parker would have predicted that a lower  $pH_i$ , which favors  
457 protonation of the sidechain of the E-gate, would interfere with hydrogen bond formation between E166  
458 and Y512, a scenario directly opposite to that observed in this study.

459         Although our study does not illustrate the structural mechanism of the slow gating, the  
460 intracellular  $H^+$  inhibition of CLC-0 does provide several insights for this gating mechanism. First, we  
461 found a strong dependence of the inhibition rate on  $[H^+]_i$ . At a room temperature of 21-22°C, the values  
462 of  $\tau_{inh}$  from experiments using protocol II are  $\sim 0.1$ , 1 and  $\sim 10$  sec at  $pH_i = 4.5$ , 5.5, and 6, respectively  
463 (Fig. 5 B). This finding explains the previous observation of the very large (several hundred seconds)  
464 relaxation time constant of the slow-gate closure at a neutral  $pH_i$  of 7.4 ( $[H^+]_i < 100$  nM) at the same

465 temperature [38, 39]. Thus, the binding of intracellular  $H^+$  to CLC-0 likely initiates the process of slow-  
466 gate closure in CLC-0.

467         The second insight our study offers is to explain the inverted voltage-dependent activation in  
468 some CLC channel mutants (such as the V490W mutant shown in this study). Unlike WT CLC-0,  
469 membrane depolarization is unable to open this mutant. On the other hand, this mutant is opened by  
470 membrane hyperpolarization (Fig. 9 D), a voltage dependence similar to that of the slow-gate opening  
471 of CLC-0. We also show that intracellular  $H^+$  speeds up the rate of the slow-gate closure, thus  
472 generating an apparent inverted voltage-dependent channel opening even in WT CLC-0. It is thus  
473 possible that mutants of CLC-0 with inverted voltage-dependent activation have a fast slow-gate  
474 closure at neutral  $pH_i$ . By constructing the V490W mutation in the background of C212S or Y512A,  
475 two mutants with little slow-gate closure, we show the double mutants, V490W/C212S and  
476 V490W/Y512A, no longer exhibit the inverted voltage-dependent opening (Fig. 9 C & D).

477         Careful inspection of the intracellular  $H^+$  inhibition of the C212S and Y512A mutants may  
478 provide further insight into the mechanism of the slow gating. The slow gate in these two mutants are  
479 mostly open. Accordingly, these two mutations significantly weaken the effects of manipulations that  
480 facilitate the slow-gate closure in CLC-0, such as a rise of experimental temperature or an application  
481 of extracellular zinc ions ( $Zn^{2+}$ ) [44, 45]. Here we add another manipulation that facilitates the  
482 inactivation in WT CLC-0, namely, an increase of  $[H^+]_i$ . However, both C212S and Y512A are still  
483 inhibited by intracellular  $H^+$ , although a much higher concentration of  $[H^+]_i$  is required. The rates of  
484 current inhibition in these two mutants upon applying  $[H^+]_i$  seem to be roughly similar to that of WT  
485 CLC-0 (Fig. 8 A & B). On the other hand, current recovery from  $H^+$  inhibition is much faster in these  
486 two mutants than in WT CLC-0. Thus, a weaker  $H^+$  inhibition in these mutants is due to a faster current

487 recovery (Fig. 8 A & C). We thus propose the following model (model 1) to explain the H<sup>+</sup>-induced  
488 slow-gate closure of CLC-0:

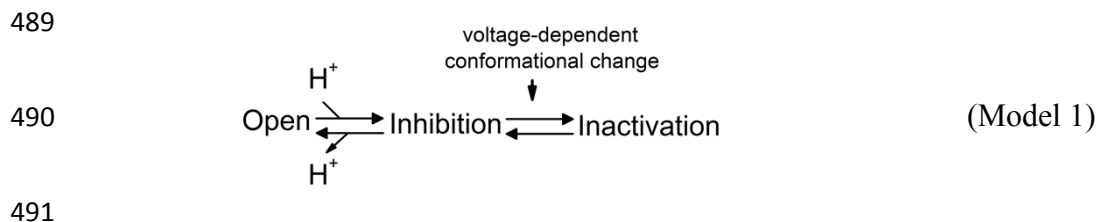

492 Here we propose that after the binding of intracellular H<sup>+</sup> to the channel, the channel pore is  
493 closed (“Inhibition” state), followed by the channel’s entry into a stable “Inactivation” state via a  
494 voltage-dependent gating step. The H<sup>+</sup> titration curves show that the apparent pK<sub>a</sub> (namely, the pH<sub>i</sub>  
495 where the current is half inhibited by H<sup>+</sup>) of WT CLC-0 is ~ 6, while the apparent pK<sub>a</sub>’s of C212S and  
496 Y512A are about 1 pH unit lower (Fig. 6 C & Fig. 9 B). Since the pK<sub>a</sub> changes by C212S and Y512A  
497 mutations are similar, it is less likely that the mutation effects are caused by a lack of H<sup>+</sup> titration of the  
498 thiol group of C212S and the phenolic hydroxyl group of Y512 (which have very different true pK<sub>a</sub>  
499 values). We suggest that the C212S and Y512A mutations do not alter the H<sup>+</sup> binding step in model 1  
500 but significantly increase the energy barrier between the “Inhibition” state and the “Inactivation” state,  
501 thus preventing the channel from entering the “Inactivation” state. Because these two mutant channels  
502 are rarely in the stable “Inactivation” state even with high [H<sup>+</sup>]<sub>i</sub>, the current recovery upon removing  
503 H<sup>+</sup> is fast and not voltage dependent.

504 Interesting questions remain regarding how intracellular H<sup>+</sup> binding to the channel from the  
505 intracellular side inhibits the Cl<sup>-</sup> current flow in CLC-0, and how C212S and Y512A mutations prevent  
506 the channel from entering the inactivation state. Answering these questions are not possible without  
507 further specific experiments. For example, we have not examined the functional roles of Cl<sup>-</sup> in this H<sup>+</sup>  
508 inhibitory effect on CLC-0’s slow gating. The present study also does not address the question whether

509 transmembrane  $[H^+]$  gradient plays a role in the low- $pH_i$ -induced inhibition. Given the significant  
510 difference in the current recovery between the positive and negative voltages (Fig. 5 A), it is interesting  
511 to understand whether this difference results from a true voltage-dependent effect or is related to the  
512 direction of  $Cl^-$  or  $H^+$  flux. Furthermore, mutations of amino acid residues with a titratable sidechain  
513 will help us identify the potential  $H^+$ -binding site(s) responsible for the intracellular  $H^+$ -induced current  
514 inhibition, and this endeavor may help us explore what specific conformational change is involved in  
515 slow gating. Previous research suggested that the mutations, at least in the case of C212S, may render  
516 the relative movement of the two subunits less likely [46]. This scenario is certainly consistent with the  
517 model proposed above if such a conformational change is associated with the gating step between the  
518 “Inhibition” and the “Inactivation” state.

519         In summary, although the molecular mechanism underlying the slow gating of CLC-0 is still  
520 largely unknown, the experimental results we present in this study offer several refinements of our  
521 knowledge. First, we find that increased  $[H^+]_i$  increases the rate of slow-gate closure of WT CLC-0,  
522 and thus the slow kinetics (tens to hundreds of seconds) of CLC-0 slow gating at neutral  $pH_i$  is likely  
523 due to low  $[H^+]_i$  ( $< 0.1 \mu M$ ) rather than due to a large conformational change of the channel protein.  
524 Second, the inverted voltage-dependent activation of the V490W mutant is likely due to an excessively  
525 fast slow-gate closure of the mutant at neutral  $pH_i$ . Finally, our results are still consistent with an  
526 involvement of a protein conformational change in the slow gating, which likely occurs between the  
527 “Inhibition” and the “Inactivation” states shown in model 1. Future experiments based on these insights  
528 may help us further unveil the slow-gating mechanism of CLC channels.

529

530



531

532

## 533 **Acknowledgment**

534           We thank Dr. Wei-Ping Yu for constructing the cDNA constructs of the WT CLC-0 and all  
535 the mutants.

536

537

538

## 539 **Author Contributions**

540 Conceived and designed the experiments: HCK, YY, TC. Performed the electrophysiological  
541 experiments: HCK, YY. Analyzed the data, HCK, YY; Contributed reagents/materials/analysis tools: TC.  
542 Wrote the paper: HCK, RHF, TC.

543

544

545

## 546 **References**

547

- 548 1. Jentsch TJ, Pusch M. CLC Chloride Channels and Transporters: Structure, Function,  
549 Physiology, and Disease. *Physiol Rev.* 2018;98(3):1493-590. doi:  
550 10.1152/physrev.00047.2017. PubMed PMID: 29845874.
- 551 2. Jentsch TJ. Discovery of CLC transport proteins: cloning, structure, function and  
552 pathophysiology. *J Physiol.* 2015;593(18):4091-109. doi: 10.1113/JP270043. PubMed PMID:  
553 25590607; PubMed Central PMCID: PMC4594286.

- 554 3. Jentsch TJ, Poet M, Fuhrmann JC, Zdebek AA. Physiological functions of CLC Cl<sup>-</sup> channels  
555 gleaned from human genetic disease and mouse models. *Annu Rev Physiol.* 2005;67:779-807.  
556 PubMed PMID: 15709978.
- 557 4. Jentsch TJ, Steinmeyer K, Schwarz G. Primary structure of *Torpedo marmorata* chloride  
558 channel isolated by expression cloning in *Xenopus* oocytes. *Nature.* 1990;348(6301):510-4.  
559 PubMed PMID: 2174129.
- 560 5. Steinmeyer K, Ortland C, Jentsch TJ. Primary structure and functional expression of a  
561 developmentally regulated skeletal muscle chloride channel. *Nature.* 1991;354(6351):301-4.  
562 PubMed PMID: 1659664.
- 563 6. Thiemann A, Grunder S, Pusch M, Jentsch TJ. A chloride channel widely expressed in  
564 epithelial and non-epithelial cells. *Nature.* 1992;356(6364):57-60. PubMed PMID: 1311421.
- 565 7. Uchida S, Sasaki S, Furukawa T, Hiraoka M, Imai T, Hirata Y, et al. Molecular cloning of a  
566 chloride channel that is regulated by dehydration and expressed predominantly in kidney  
567 medulla. *J Biol Chem.* 1993;268(6):3821-4. PubMed PMID: 7680033.
- 568 8. Maduke M, Pheasant DJ, Miller C. High-level expression, functional reconstitution, and  
569 quaternary structure of a prokaryotic ClC-type chloride channel. *J Gen Physiol.*  
570 1999;114(5):713-22. PubMed PMID: 10539975.
- 571 9. Accardi A, Miller C. Secondary active transport mediated by a prokaryotic homologue of ClC  
572 Cl<sup>-</sup> channels. *Nature.* 2004;427(6977):803-7. PubMed PMID: 14985752.
- 573 10. Iyer R, Iverson TM, Accardi A, Miller C. A biological role for prokaryotic ClC chloride  
574 channels. *Nature.* 2002;419(6908):715-8. PubMed PMID: 12384697.
- 575 11. Lloyd SE, Gunther W, Pearce SH, Thomson A, Bianchi ML, Bosio M, et al. Characterisation  
576 of renal chloride channel, CLCN5, mutations in hypercalcaemic nephrolithiasis (kidney stones)  
577 disorders. *Hum Mol Genet.* 1997;6(8):1233-9. PubMed PMID: 9259268.
- 578 12. Picollo A, Pusch M. Chloride/proton antiporter activity of mammalian CLC proteins ClC-4 and  
579 ClC-5. *Nature.* 2005;436(7049):420-3. PubMed PMID: 16034421.
- 580 13. Poet M, Kornak U, Schweizer M, Zdebek AA, Scheel O, Hoelter S, et al. Lysosomal storage  
581 disease upon disruption of the neuronal chloride transport protein ClC-6. *Proc Natl Acad Sci U*  
582 *S A.* 2006;103(37):13854-9. PubMed PMID: 16950870.
- 583 14. Matsumoto A, Matsui I, Mori T, Sakaguchi Y, Mizui M, Ueda Y, et al. Severe Osteomalacia  
584 with Dent Disease Caused by a Novel Intronic Mutation of the CLCN5 gene. *Intern Med.*  
585 2018;57(24):3603-10. doi: 10.2169/internalmedicine.1272-18. PubMed PMID: 30101934;  
586 PubMed Central PMCID: PMC6355425.
- 587 15. Piwon N, Gunther W, Schwake M, Bosl MR, Jentsch TJ. ClC-5 Cl<sup>-</sup> channel disruption  
588 impairs endocytosis in a mouse model for Dent's disease. *Nature.* 2000;408(6810):369-73.  
589 PubMed PMID: 11099045.
- 590 16. Middleton RE, Pheasant DJ, Miller C. Purification, reconstitution, and subunit composition of  
591 a voltage-gated chloride channel from *Torpedo* electroplax. *Biochemistry.* 1994;33(45):13189-  
592 98. PubMed PMID: 7947726.
- 593 17. Dutzler R, Campbell EB, Cadene M, Chait BT, MacKinnon R. X-ray structure of a ClC  
594 chloride channel at 3.0 Å reveals the molecular basis of anion selectivity. *Nature.*  
595 2002;415(6869):287-94. PubMed PMID: 11796999.
- 596 18. Dutzler R, Campbell EB, MacKinnon R. Gating the selectivity filter in ClC chloride channels.  
597 *Science.* 2003;300(5616):108-12. PubMed PMID: 12649487.
- 598 19. Feng L, Campbell EB, Hsiung Y, MacKinnon R. Structure of a eukaryotic CLC transporter  
599 defines an intermediate state in the transport cycle. *Science.* 2010;330(6004):635-41. Epub

- 600 2010/10/12. doi: science.1195230 [pii]10.1126/science.1195230. PubMed PMID: 20929736;  
601 PubMed Central PMCID: PMC3079386.
- 602 20. Park E, Campbell EB, MacKinnon R. Structure of a CLC chloride ion channel by cryo-electron  
603 microscopy. *Nature*. 2017;541(7638):500-5. doi: 10.1038/nature20812. PubMed PMID:  
604 28002411; PubMed Central PMCID: PMCPMC5576512.
- 605 21. Park E, MacKinnon R. Structure of the CLC-1 chloride channel from *Homo sapiens*. *Elife*.  
606 2018;7. doi: 10.7554/eLife.36629. PubMed PMID: 29809153; PubMed Central PMCID:  
607 PMCPMC6019066.
- 608 22. Wang K, Preisler SS, Zhang L, Cui Y, Missel JW, Gronberg C, et al. Structure of the human  
609 CIC-1 chloride channel. *PLoS Biol*. 2019;17(4):e3000218. doi: 10.1371/journal.pbio.3000218.  
610 PubMed PMID: 31022181; PubMed Central PMCID: PMCPMC6483157.
- 611 23. Middleton RE, Pheasant DJ, Miller C. Homodimeric architecture of a CIC-type chloride ion  
612 channel. *Nature*. 1996;383(6598):337-40. PubMed PMID: 8848046.
- 613 24. Miller C. Open-state substructure of single chloride channels from *Torpedo* electroplax. *Philos*  
614 *Trans R Soc Lond B Biol Sci*. 1982;299(1097):401-11. PubMed PMID: 6130538.
- 615 25. Miller C, White MM. Dimeric structure of single chloride channels from *Torpedo* electroplax.  
616 *Proc Natl Acad Sci U S A*. 1984;81(9):2772-5. PubMed PMID: 6326143.
- 617 26. Chen TY. Structure and function of clc channels. *Annu Rev Physiol*. 2005;67:809-39. Epub  
618 2005/02/16. doi: 10.1146/annurev.physiol.67.032003.153012. PubMed PMID: 15709979.
- 619 27. Pusch M, Ludewig U, Rehfeldt A, Jentsch TJ. Gating of the voltage-dependent chloride  
620 channel CIC-0 by the permeant anion. *Nature*. 1995;373(6514):527-31. PubMed PMID:  
621 7845466.
- 622 28. Chen TY, Miller C. Nonequilibrium gating and voltage dependence of the CIC-0 Cl<sup>-</sup> channel. *J*  
623 *Gen Physiol*. 1996;108(4):237-50. PubMed PMID: 8894974.
- 624 29. Chen TY, Chen MF, Lin CW. Electrostatic control and chloride regulation of the fast gating of  
625 CIC-0 chloride channels. *J Gen Physiol*. 2003;122(5):641-51. Epub 2003/10/29. doi:  
626 10.1085/jgp.200308846. PubMed PMID: 14581587; PubMed Central PMCID:  
627 PMCPMC2229583.
- 628 30. Chen TY. Coupling gating with ion permeation in CIC channels. *Sci STKE*.  
629 2003;2003(188):pe23. Epub 2003/06/26. doi: 10.1126/stke.2003.188.pe23. PubMed PMID:  
630 12824475.
- 631 31. Dutzler R. Structural basis for ion conduction and gating in CIC chloride channels. *FEBS Lett*.  
632 2004;564(3):229-33. PubMed PMID: 15111101.
- 633 32. Engh AM, Faraldo-Gomez JD, Maduke M. The mechanism of fast-gate opening in CIC-0. *J*  
634 *Gen Physiol*. 2007;130(4):335-49. Epub 2007/09/12. doi: jgp.200709759  
635 [pii]10.1085/jgp.200709759. PubMed PMID: 17846164; PubMed Central PMCID:  
636 PMC2151655.
- 637 33. Zifarelli G, Murgia AR, Soliani P, Pusch M. Intracellular proton regulation of CIC-0. *J Gen*  
638 *Physiol*. 2008;132(1):185-98. PubMed PMID: 18591423.
- 639 34. Zifarelli G, Pusch M. The role of protons in fast and slow gating of the *Torpedo* chloride  
640 channel CIC-0. *Eur Biophys J*. 2010;39(6):869-75. doi: 10.1007/s00249-008-0393-x. PubMed  
641 PMID: 19132363.
- 642 35. Hanke W, Miller C. Single chloride channels from *Torpedo* electroplax. Activation by protons.  
643 *J Gen Physiol*. 1983;82(1):25-45. PubMed PMID: 6310023.
- 644 36. Chen MF, Chen TY. Different fast-gate regulation by external Cl<sup>-</sup> and H<sup>+</sup> of the muscle-  
645 type CIC chloride channels. *J Gen Physiol*. 2001;118(1):23-32. PubMed PMID: 11429442.

- 646 37. White MM, Miller C. A voltage-gated anion channel from the electric organ of *Torpedo*  
647 *californica*. *J Biol Chem*. 1979;254(20):10161-6. PubMed PMID: 489590.
- 648 38. Pusch M, Ludewig U, Jentsch TJ. Temperature dependence of fast and slow gating relaxations  
649 of ClC-0 chloride channels. *J Gen Physiol*. 1997;109(1):105-16. PubMed PMID: 8997669.
- 650 39. Chen TY. Extracellular Zinc Ion Inhibits ClC-0 Chloride Channels by Facilitating Slow  
651 Gating. *J Gen Physiol*. 1998;112(6):715-26. PubMed PMID: 9834141.
- 652 40. Richard EA, Miller C. Steady-state coupling of ion-channel conformations to a transmembrane  
653 ion gradient. *Science*. 1990;247(4947):1208-10. PubMed PMID: 2156338.
- 654 41. Lisal J, Maduke M. The ClC-0 chloride channel is a 'broken' Cl<sup>-</sup>/H<sup>+</sup> antiporter. *Nat Struct Mol*  
655 *Biol*. 2008;15(8):805-10. Epub 2008/07/22. doi: nsmb.1466 [pii]10.1038/nsmb.1466. PubMed  
656 PMID: 18641661; PubMed Central PMCID: PMC2559860.
- 657 42. Fong P, Rehfeldt A, Jentsch TJ. Determinants of slow gating in ClC-0, the voltage-gated  
658 chloride channel of *Torpedo marmorata*. *Am J Physiol*. 1998;274(4 Pt 1):C966-73. PubMed  
659 PMID: 9575793.
- 660 43. Yu Y, Tsai MF, Yu WP, Chen TY. Modulation of the slow/common gating of CLC channels  
661 by intracellular cadmium. *J Gen Physiol*. 2015;146(6):495-508. doi: 10.1085/jgp.201511413.  
662 PubMed PMID: 26621774; PubMed Central PMCID: PMC4664824.
- 663 44. Lin YW, Lin CW, Chen TY. Elimination of the slow gating of ClC-0 chloride channel by a  
664 point mutation. *J Gen Physiol*. 1999;114(1):1-12. PubMed PMID: 10398688.
- 665 45. Bennetts B, Parker MW. Molecular determinants of common gating of a ClC chloride channel.  
666 *Nat Commun*. 2013;4:2507. Epub 2013/09/26. doi: ncomms3507 [pii]10.1038/ncomms3507.  
667 PubMed PMID: 24064982.
- 668 46. Bykova EA, Zhang XD, Chen TY, Zheng J. Large movement in the C terminus of CLC-0  
669 chloride channel during slow gating. *Nat Struct Mol Biol*. 2006;13(12):1115-9. Epub  
670 2006/11/23. doi: 10.1038/nsmb1176. PubMed PMID: 17115052.
- 671 47. Bretag AH. Muscle chloride channels. *Physiol Rev*. 1987;67(2):618-724. Epub 1987/04/01.  
672 PubMed PMID: 2436244.
- 673 48. Chen TY. Single myotonia mutation strikes multiple mechanisms of a chloride channel. *J*  
674 *Physiol*. 2012;590(Pt 15):3407. Epub 2012/08/03. doi: 10.1113/jphysiol.2012.238337. PubMed  
675 PMID: 22855049; PubMed Central PMCID: PMC3547255.
- 676 49. Fahlke C, Rudel R, Mitrovic N, Zhou M, George AL, Jr. An aspartic acid residue important for  
677 voltage-dependent gating of human muscle chloride channels. *Neuron*. 1995;15(2):463-72.  
678 PubMed PMID: 7646898.
- 679 50. Macias MJ, Tejjido O, Zifarelli G, Martin P, Ramirez-Espain X, Zorzano A, et al. Myotonia-  
680 related mutations in the distal C-terminus of ClC-1 and ClC-0 chloride channels affect the  
681 structure of a poly-proline helix. *Biochem J*. 2007;403(1):79-87. Epub 2006/11/17. doi:  
682 BJ20061230 [pii]10.1042/BJ20061230. PubMed PMID: 17107341; PubMed Central PMCID:  
683 PMC1828897.
- 684 51. Lin CW, Chen TY. Cysteine modification of a putative pore residue in ClC-0: implication for  
685 the pore stoichiometry of ClC chloride channels. *J Gen Physiol*. 2000;116(4):535-46. PubMed  
686 PMID: 11004203.
- 687 52. Miller C. ClC chloride channels viewed through a transporter lens. *Nature*.  
688 2006;440(7083):484-9. PubMed PMID: 16554809.
- 689 53. Miller C, White MM. A voltage-dependent chloride conductance channel from *Torpedo*  
690 *electroplax* membrane. *Ann N Y Acad Sci*. 1980;341:534-51. PubMed PMID: 6249158.

691 54. Gradogna A, Pusch M. Alkaline pH block of CLC-K kidney chloride channels mediated by a  
692 pore lysine residue. *Biophys J.* 2013;105(1):80-90. doi: 10.1016/j.bpj.2013.05.044. PubMed  
693 PMID: 23823226; PubMed Central PMCID: PMC3699751.

694



**A**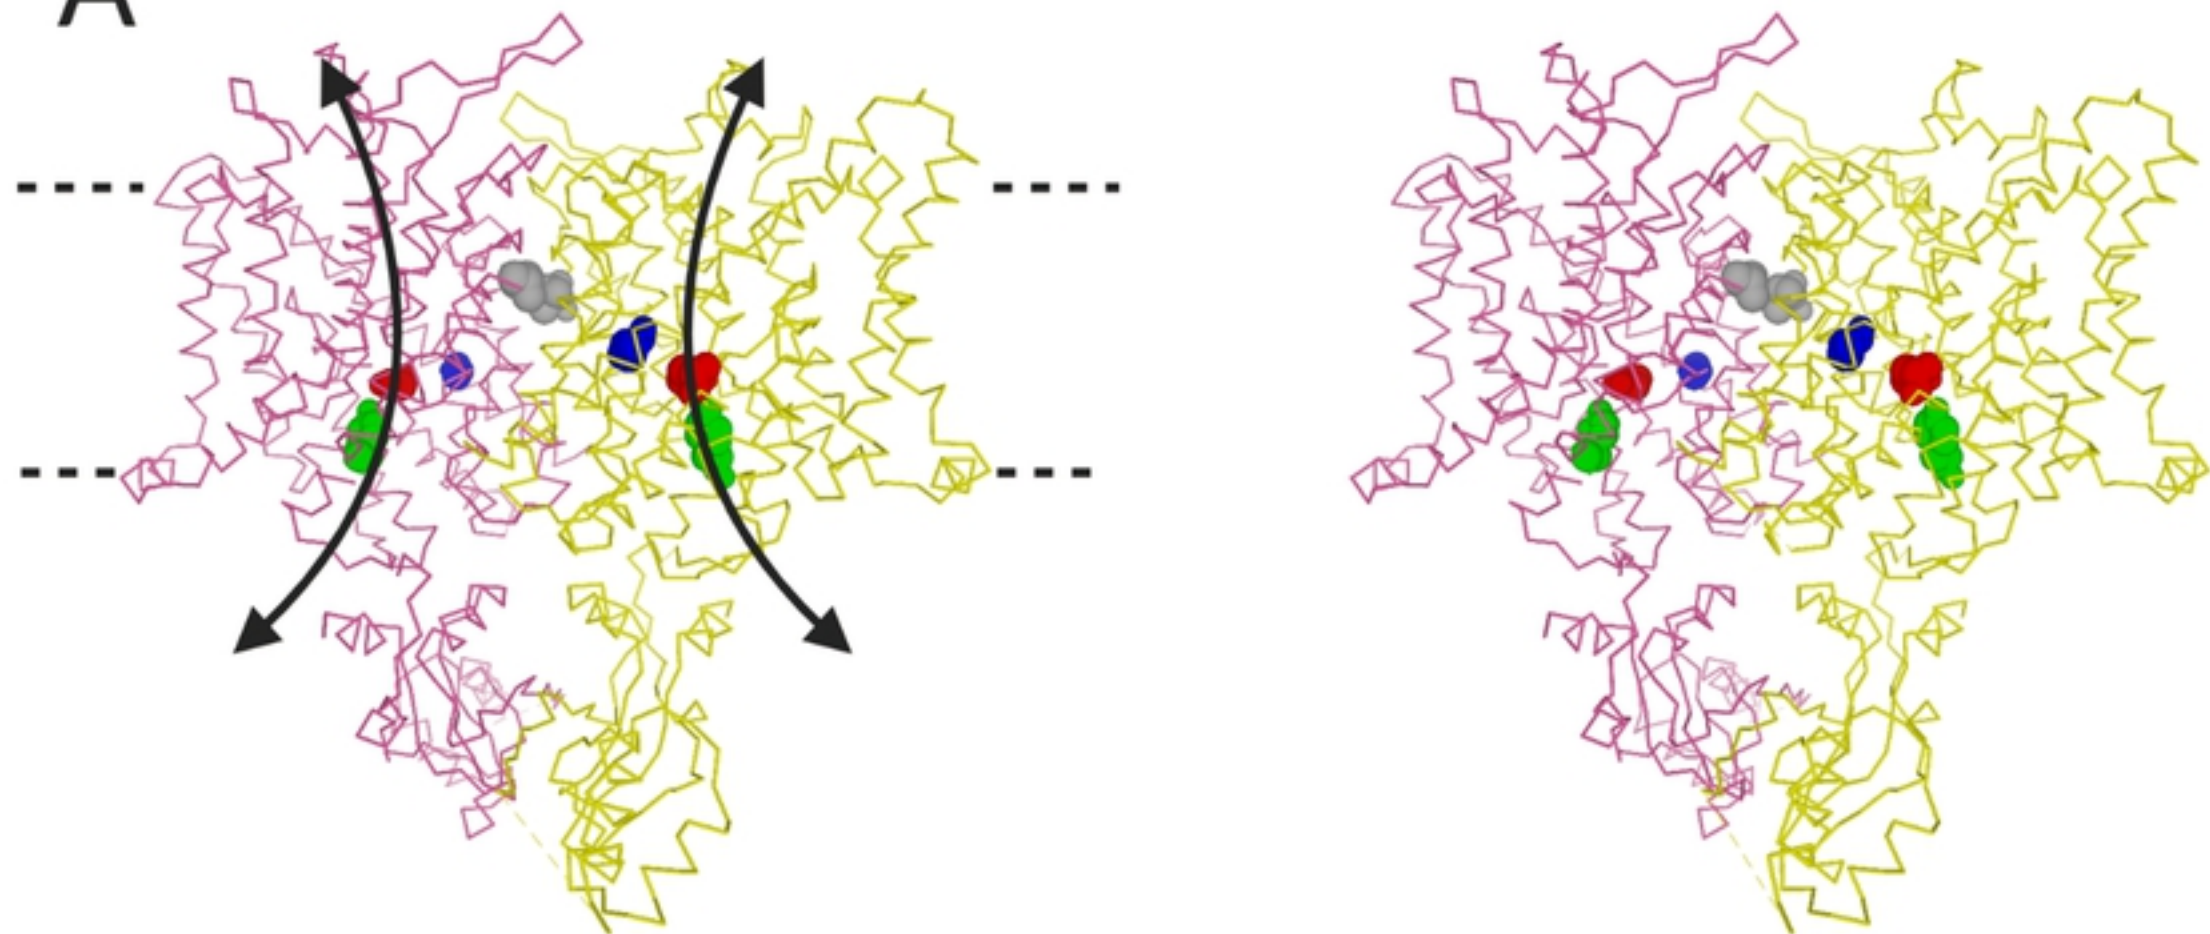**B**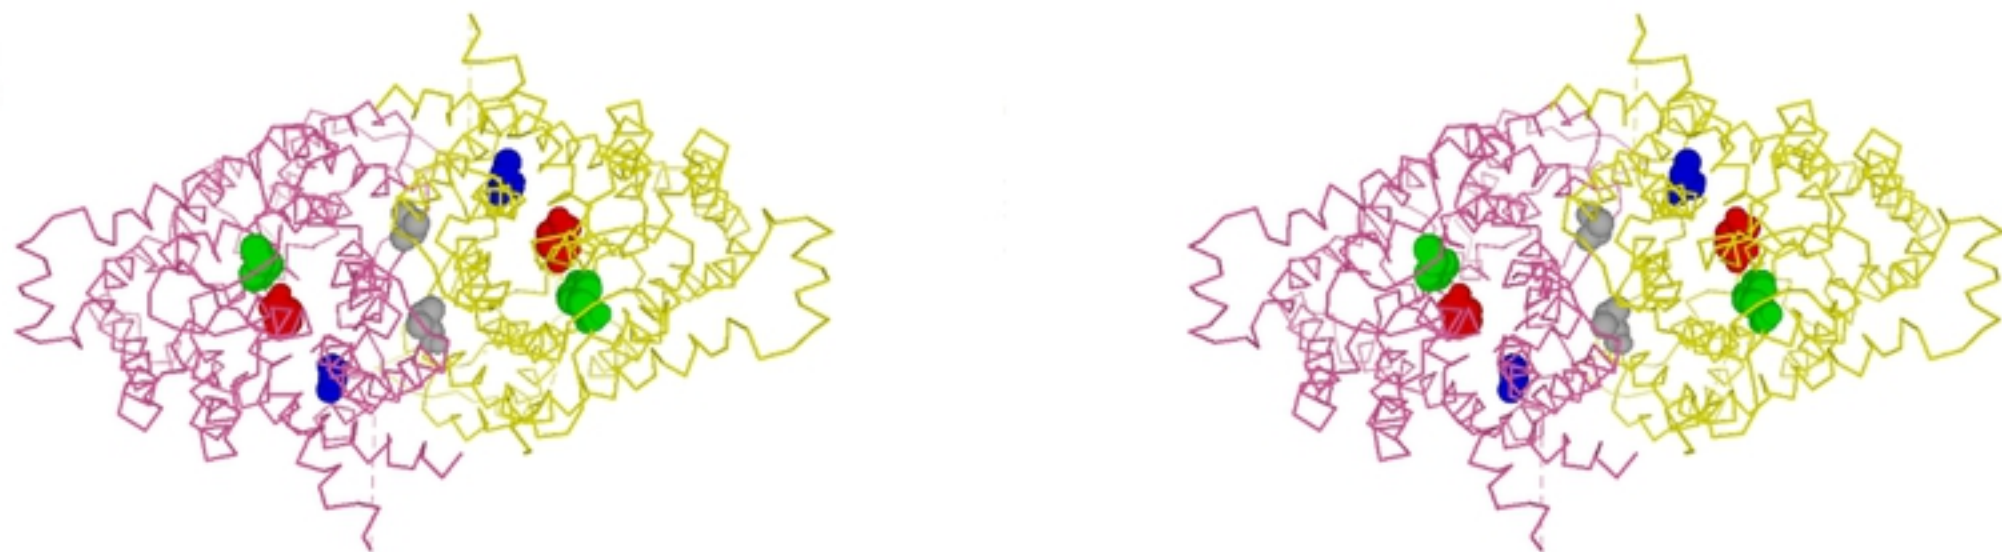

Figure 1

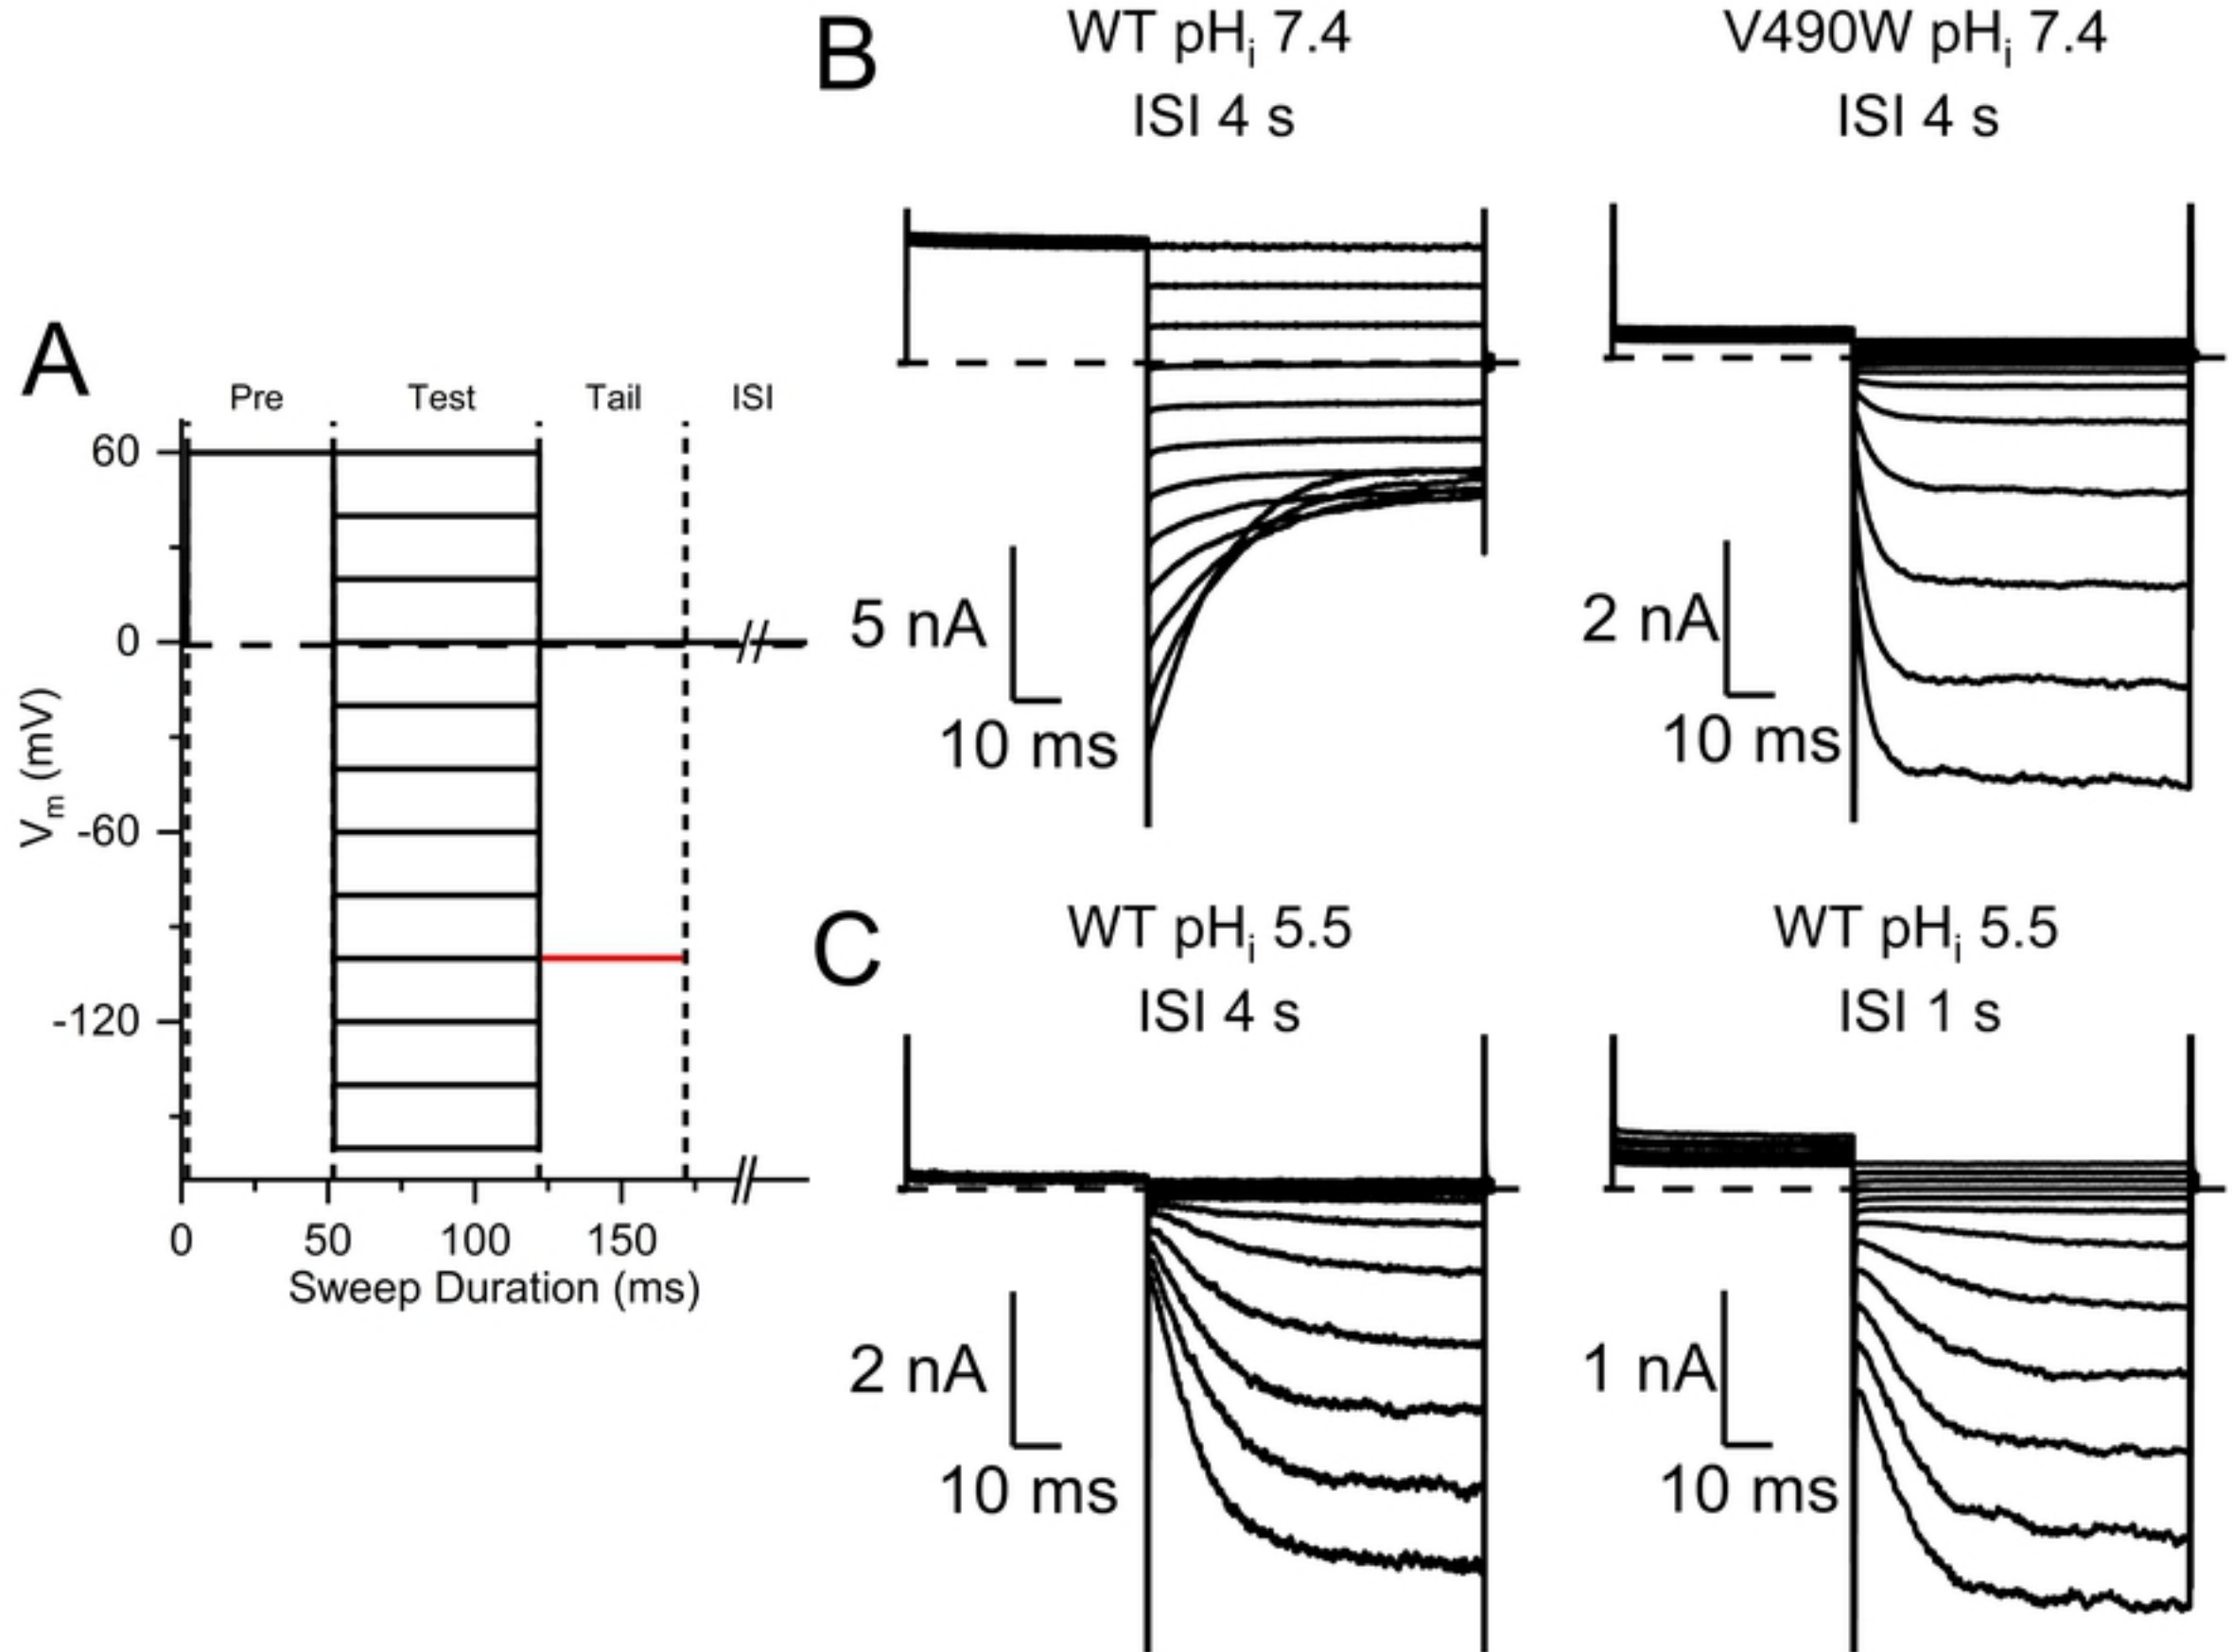

Figure 2

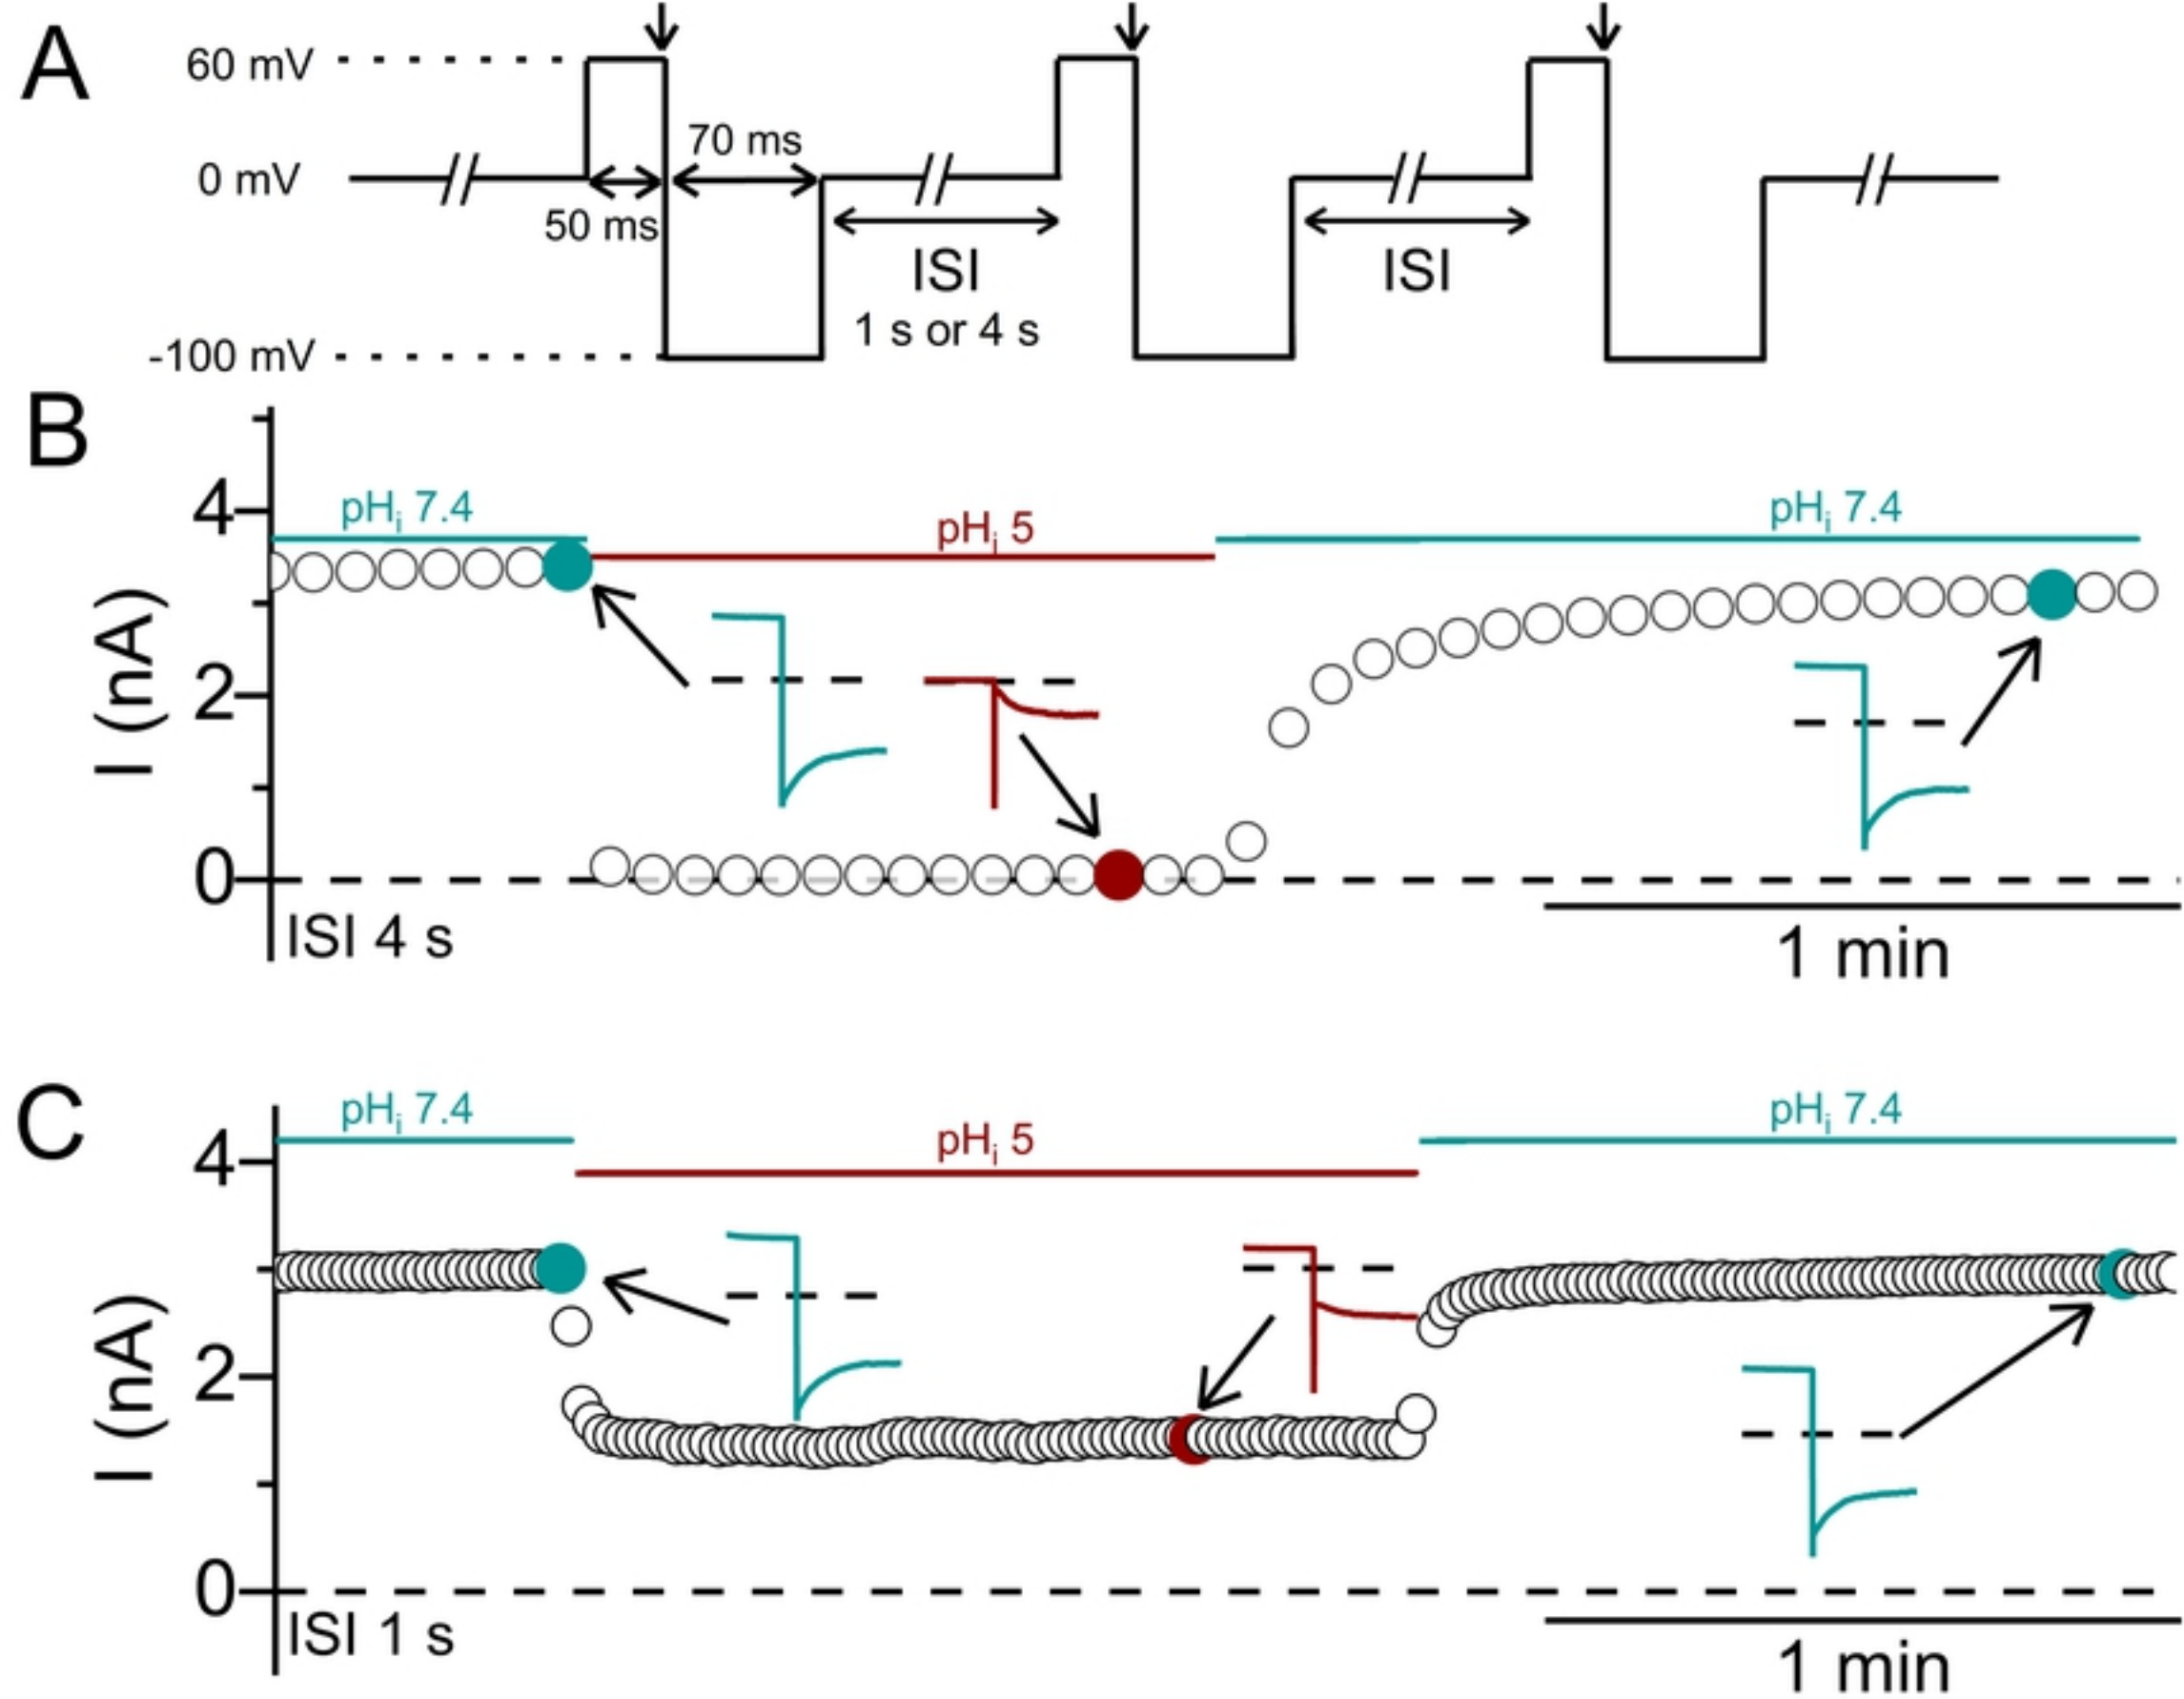

Figure 3



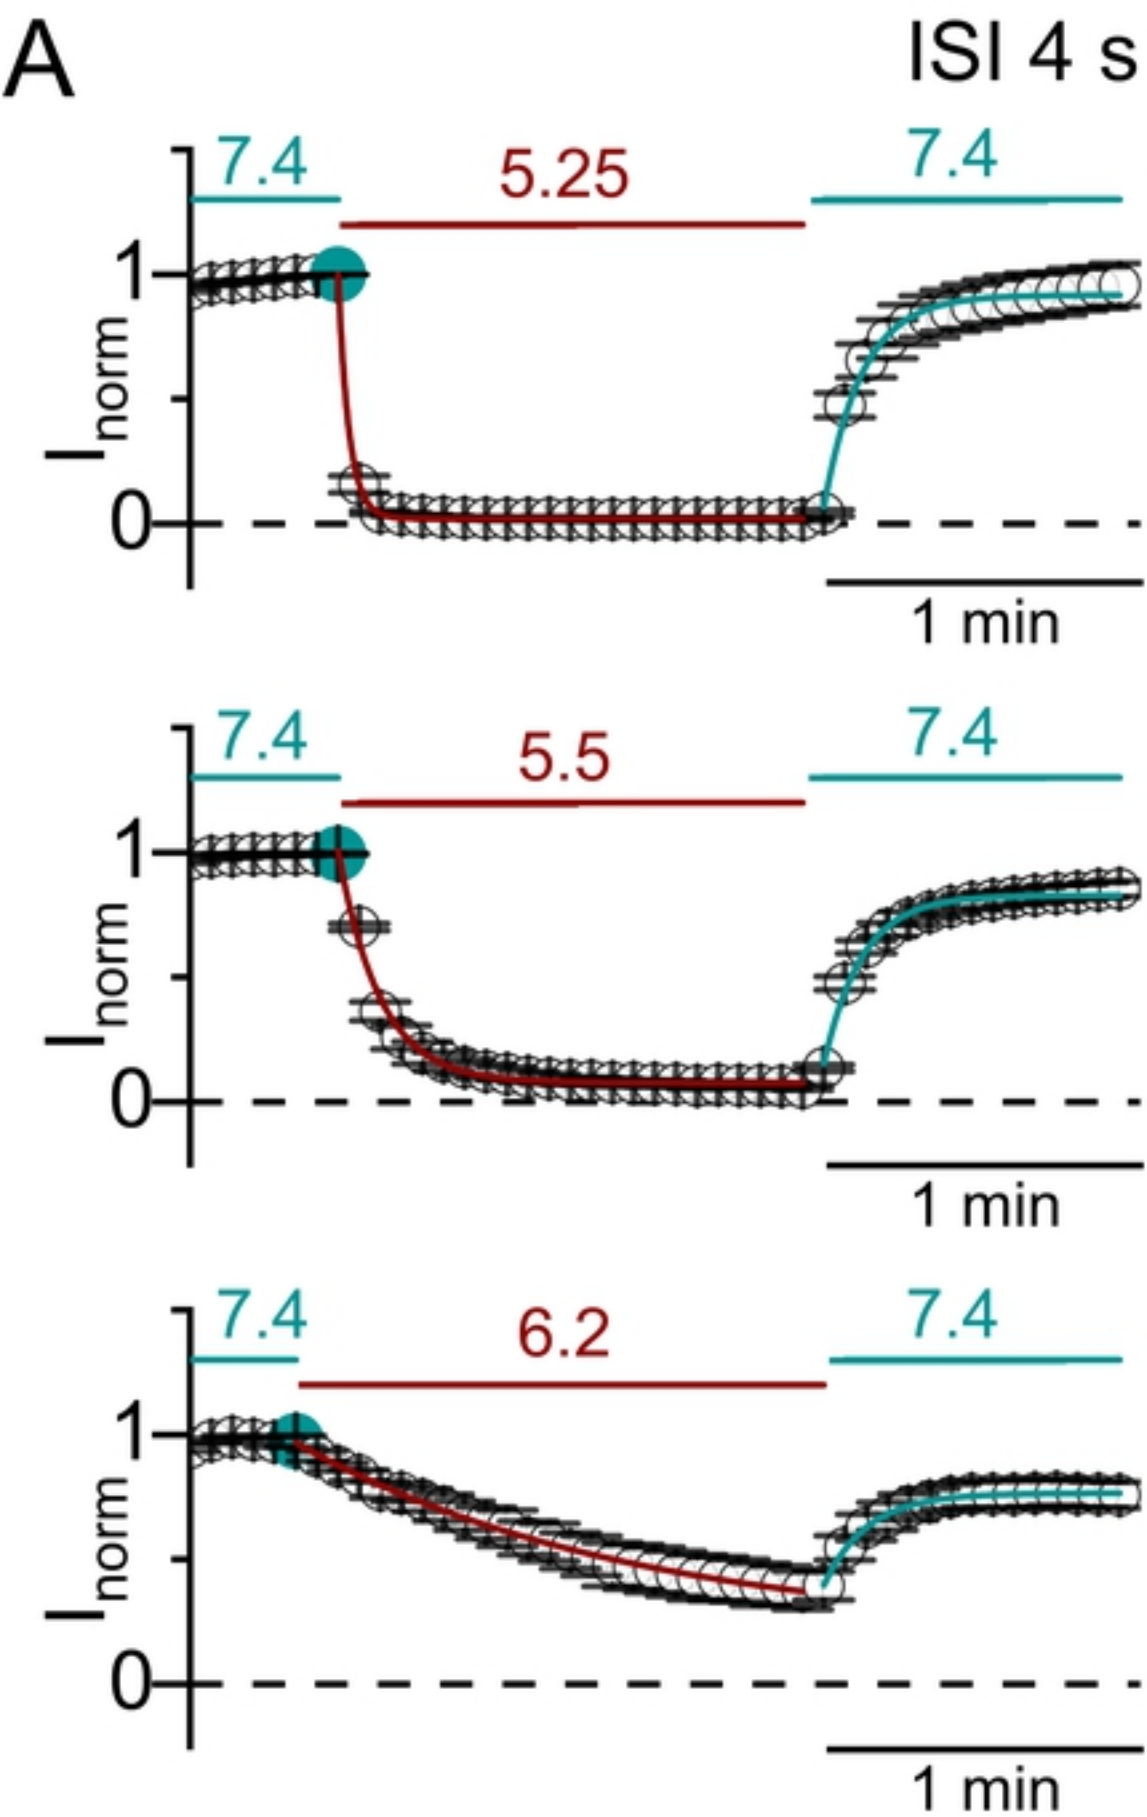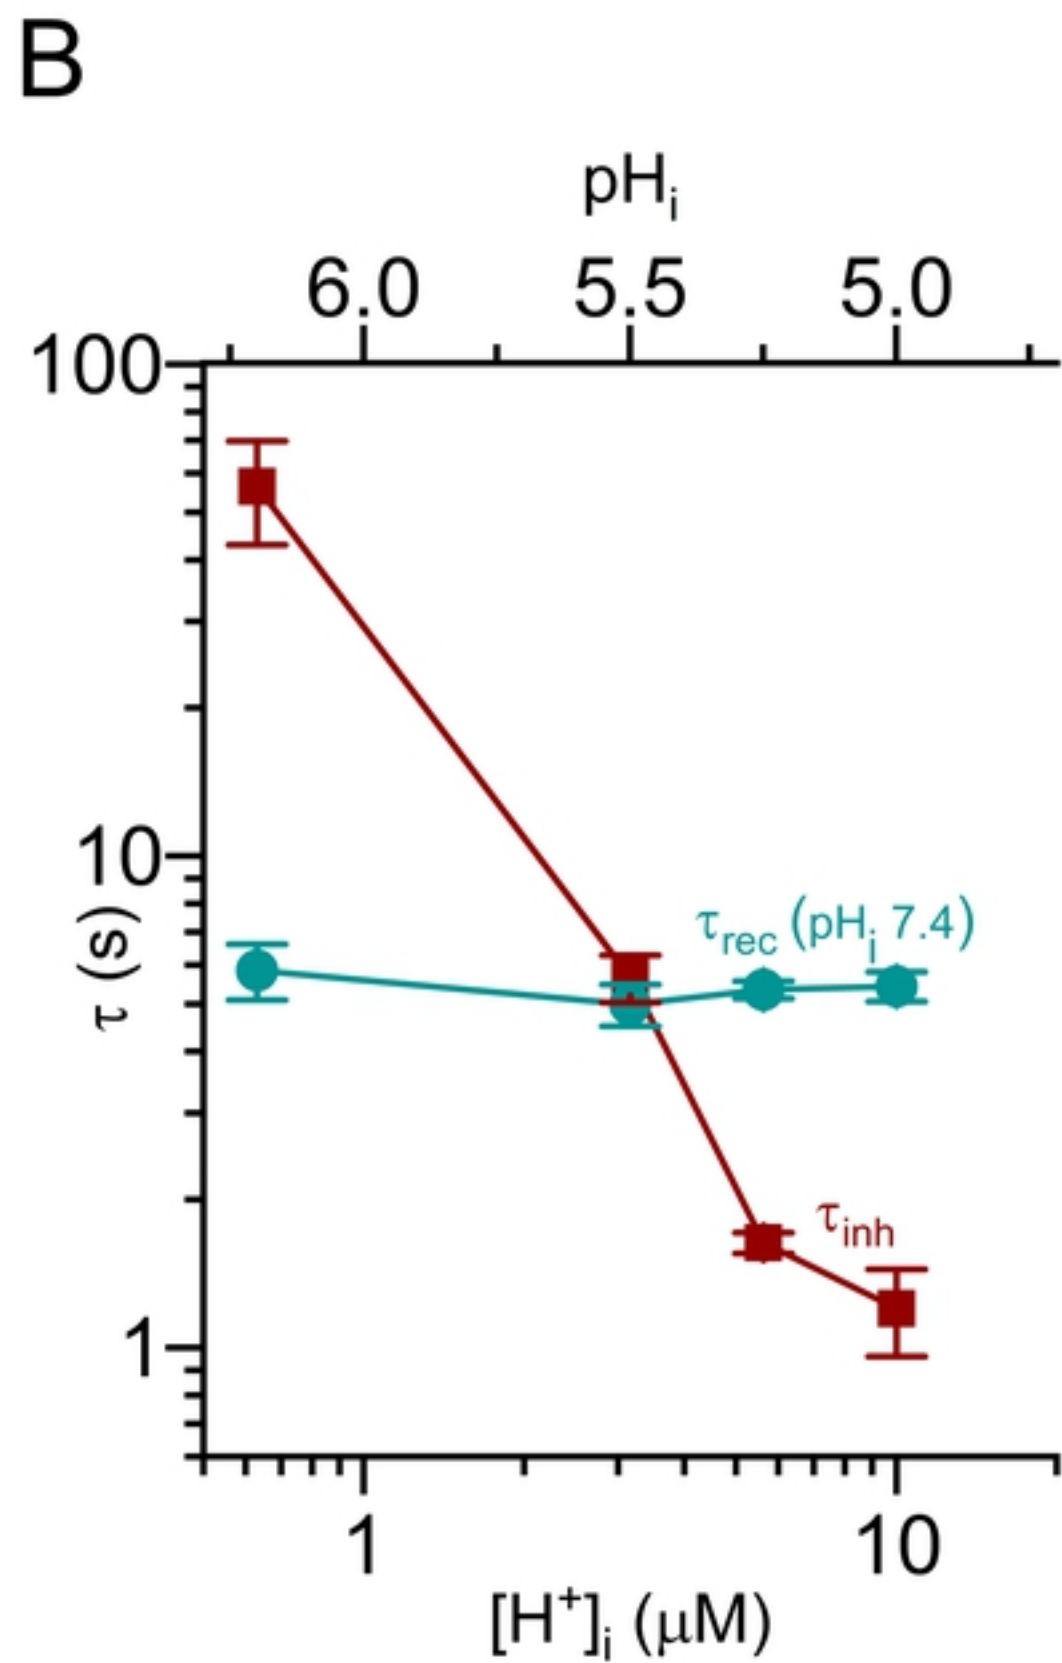

Figure 4

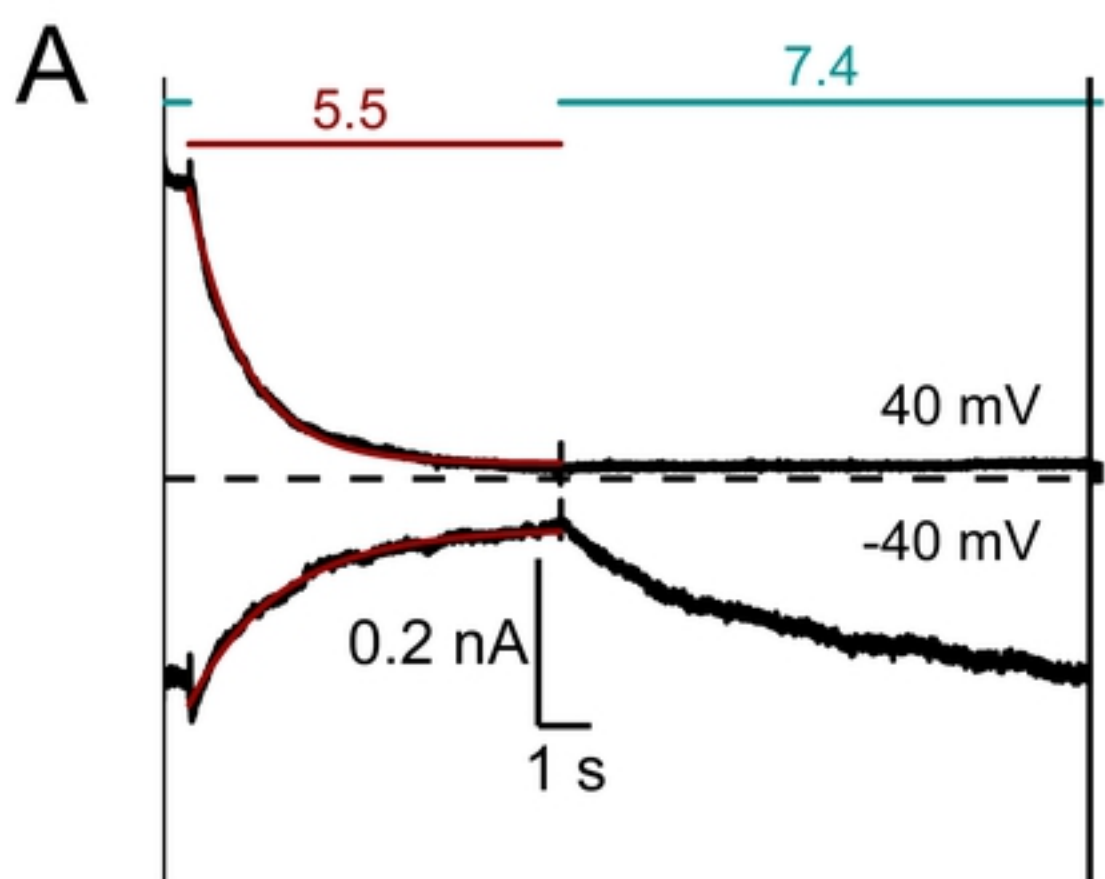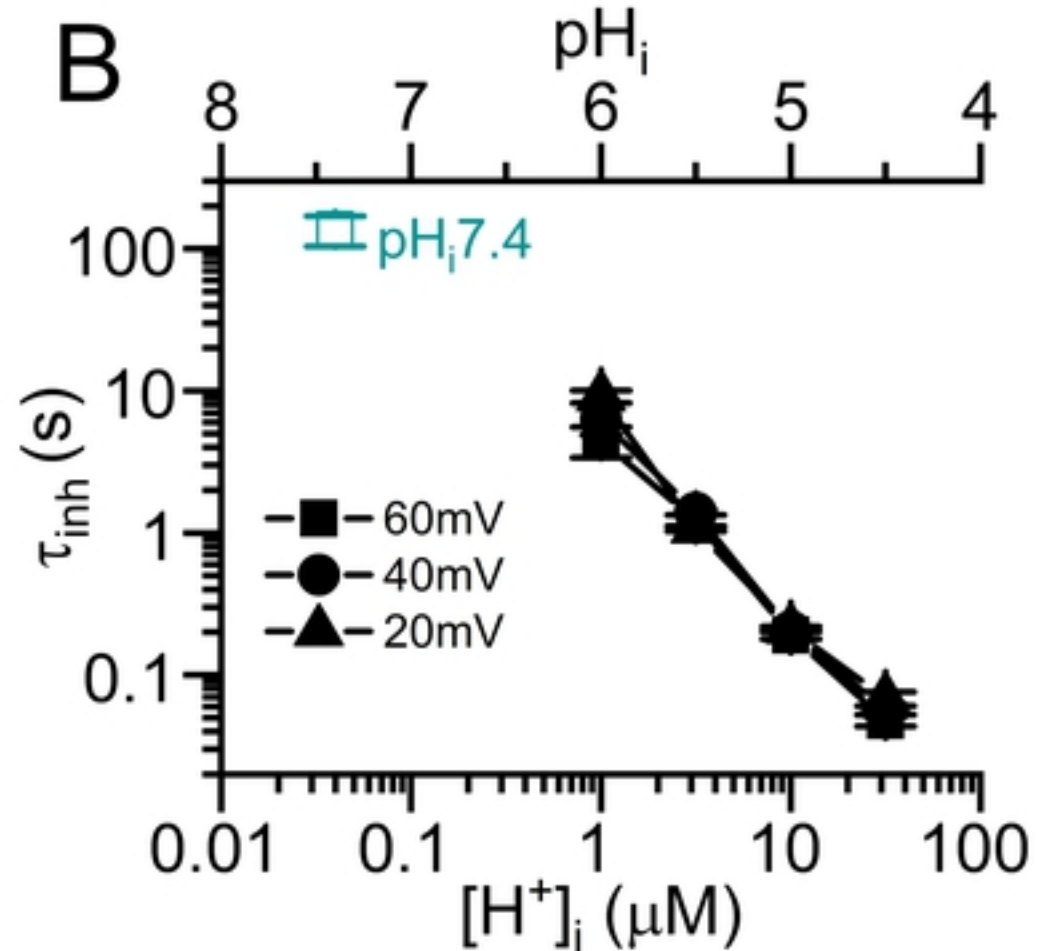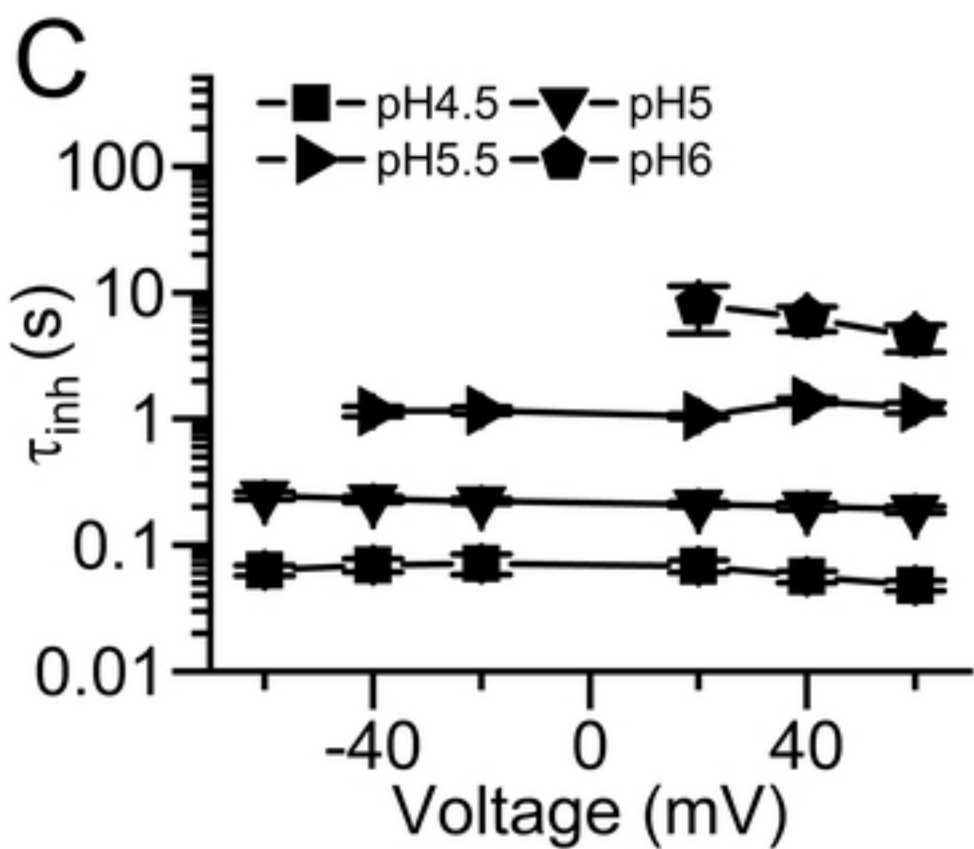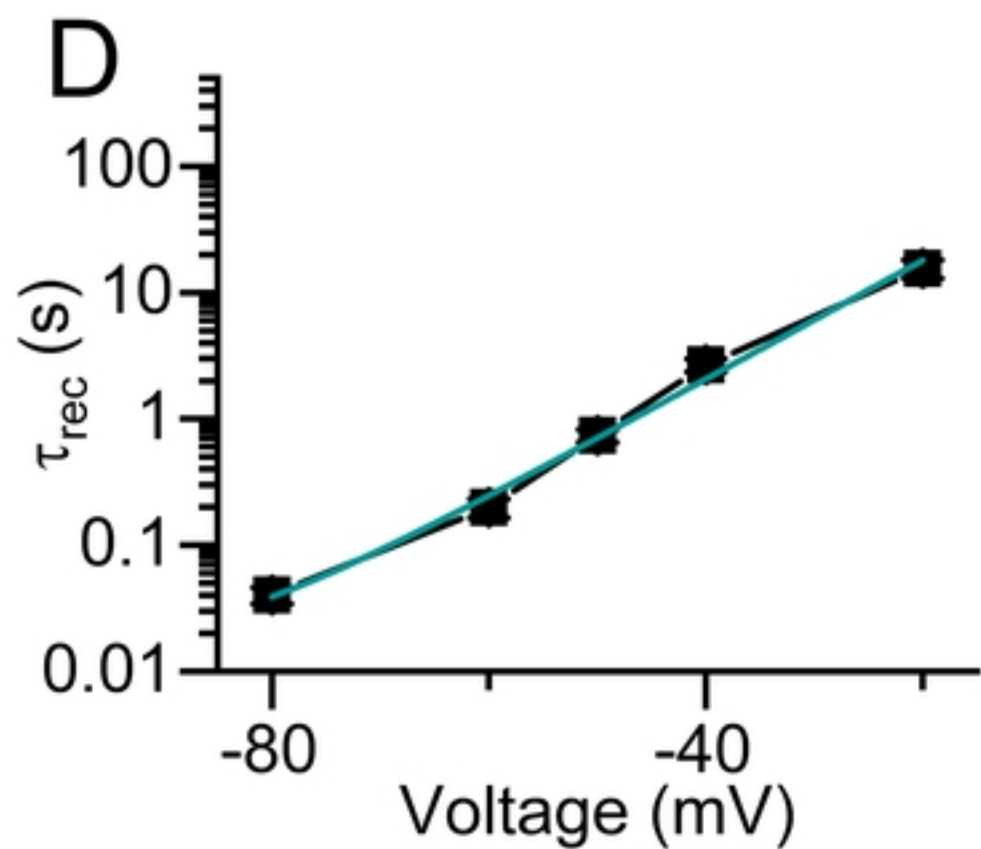

Figure 5

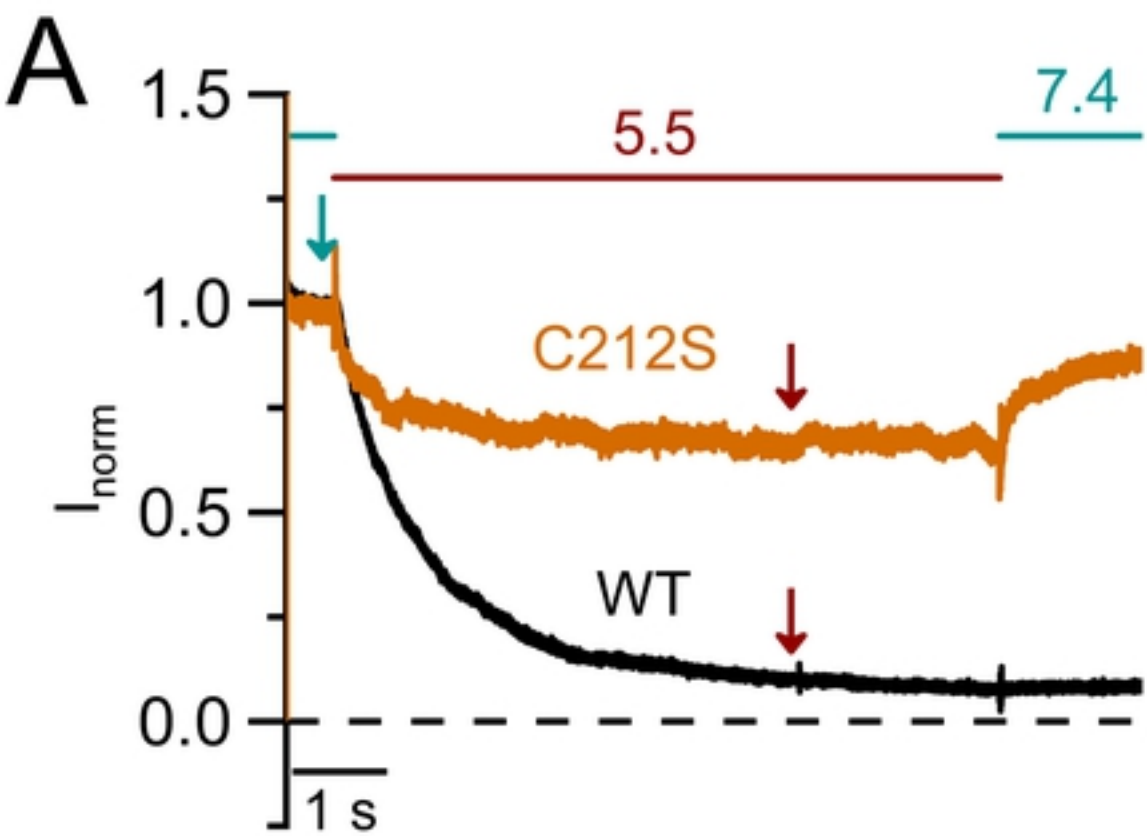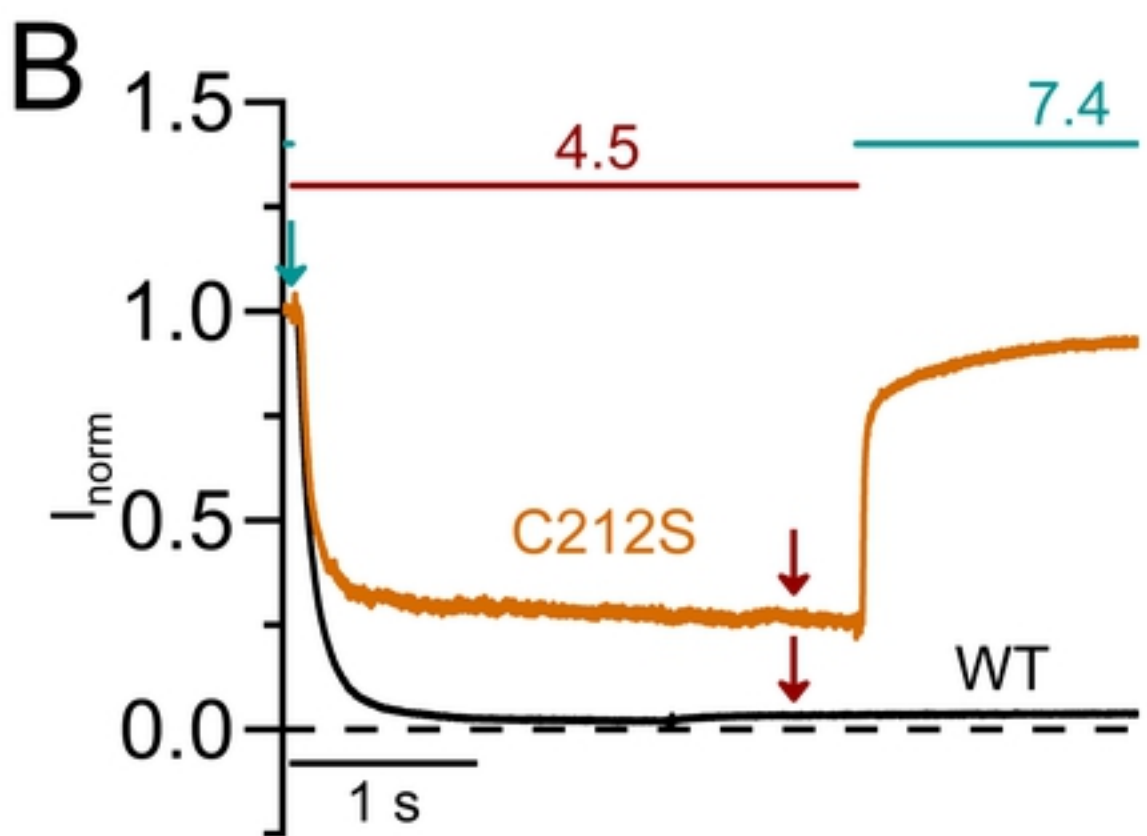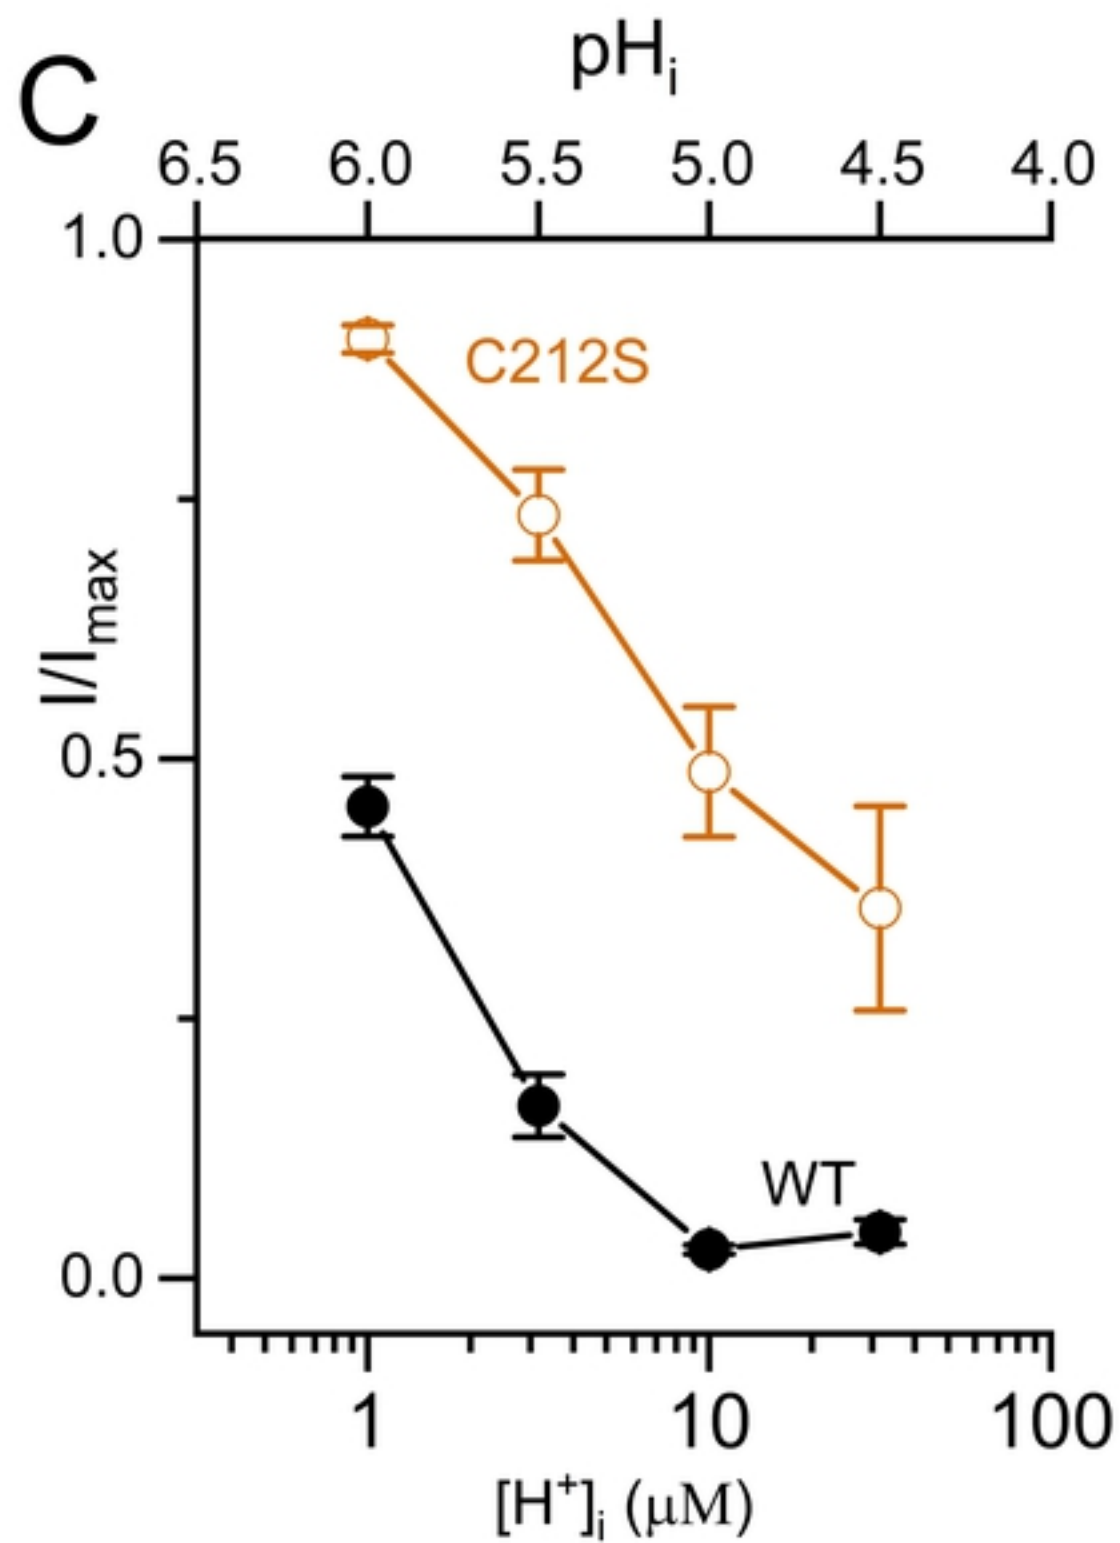

Figure 6

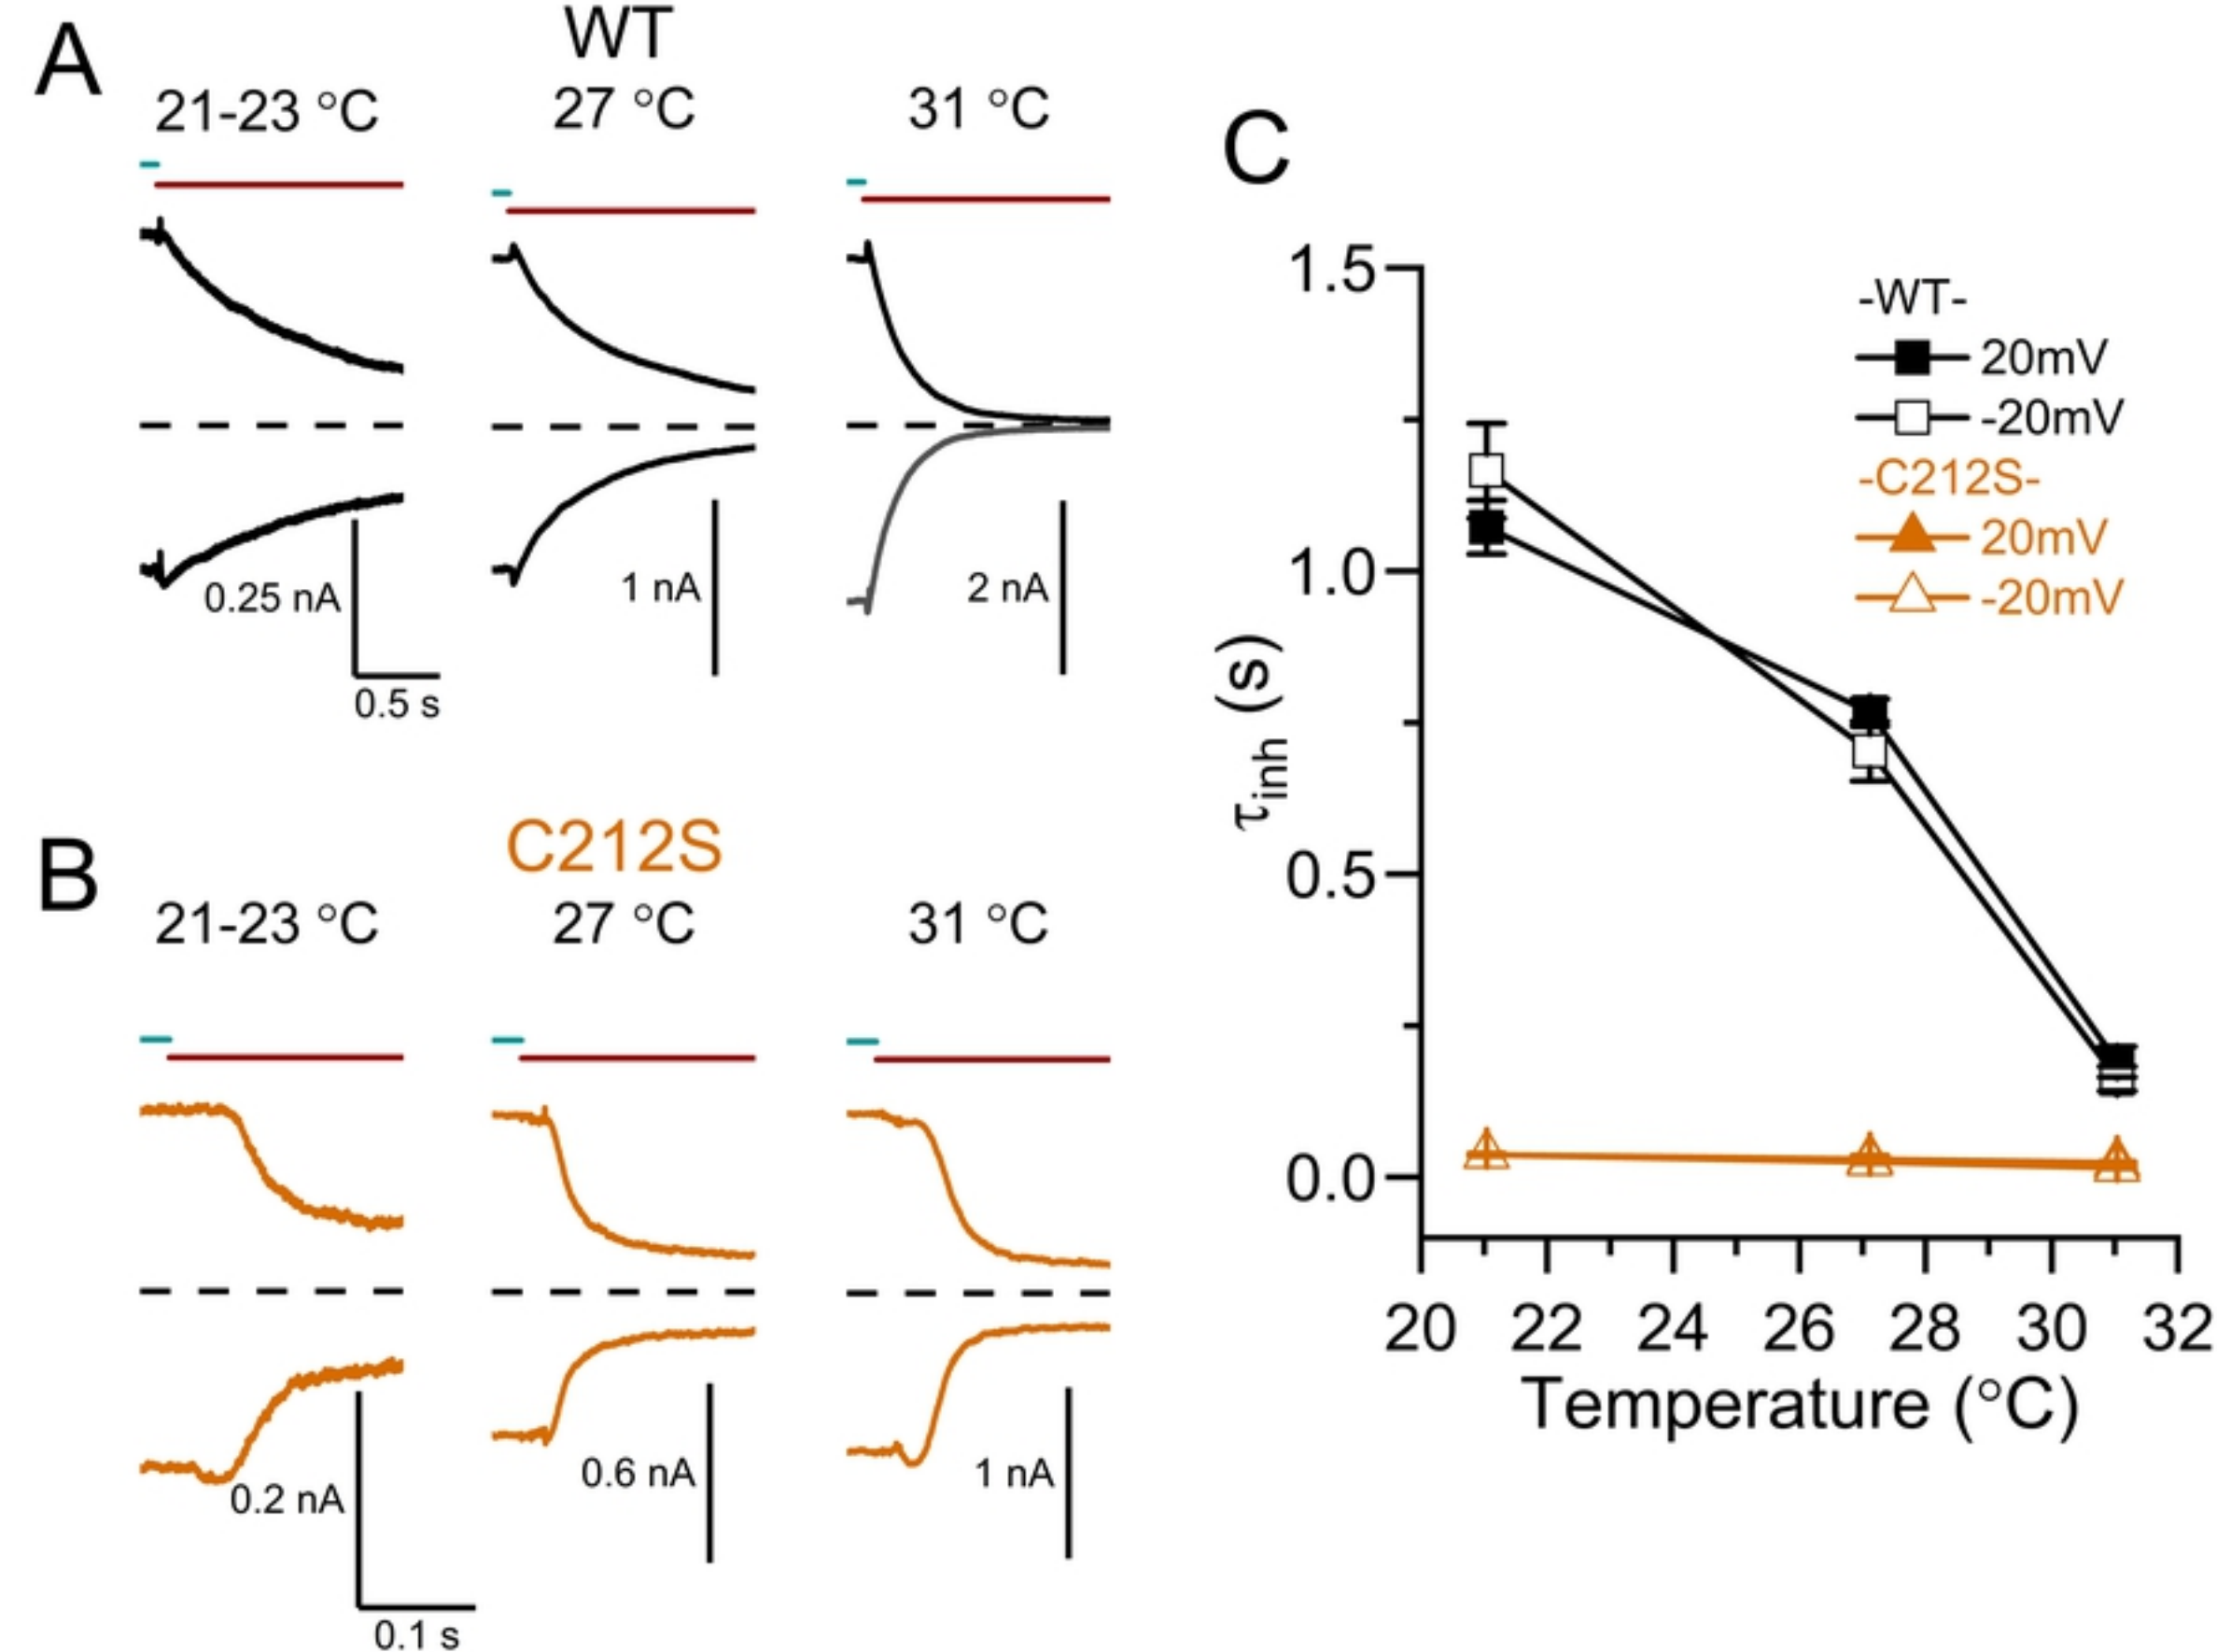

Figure 7

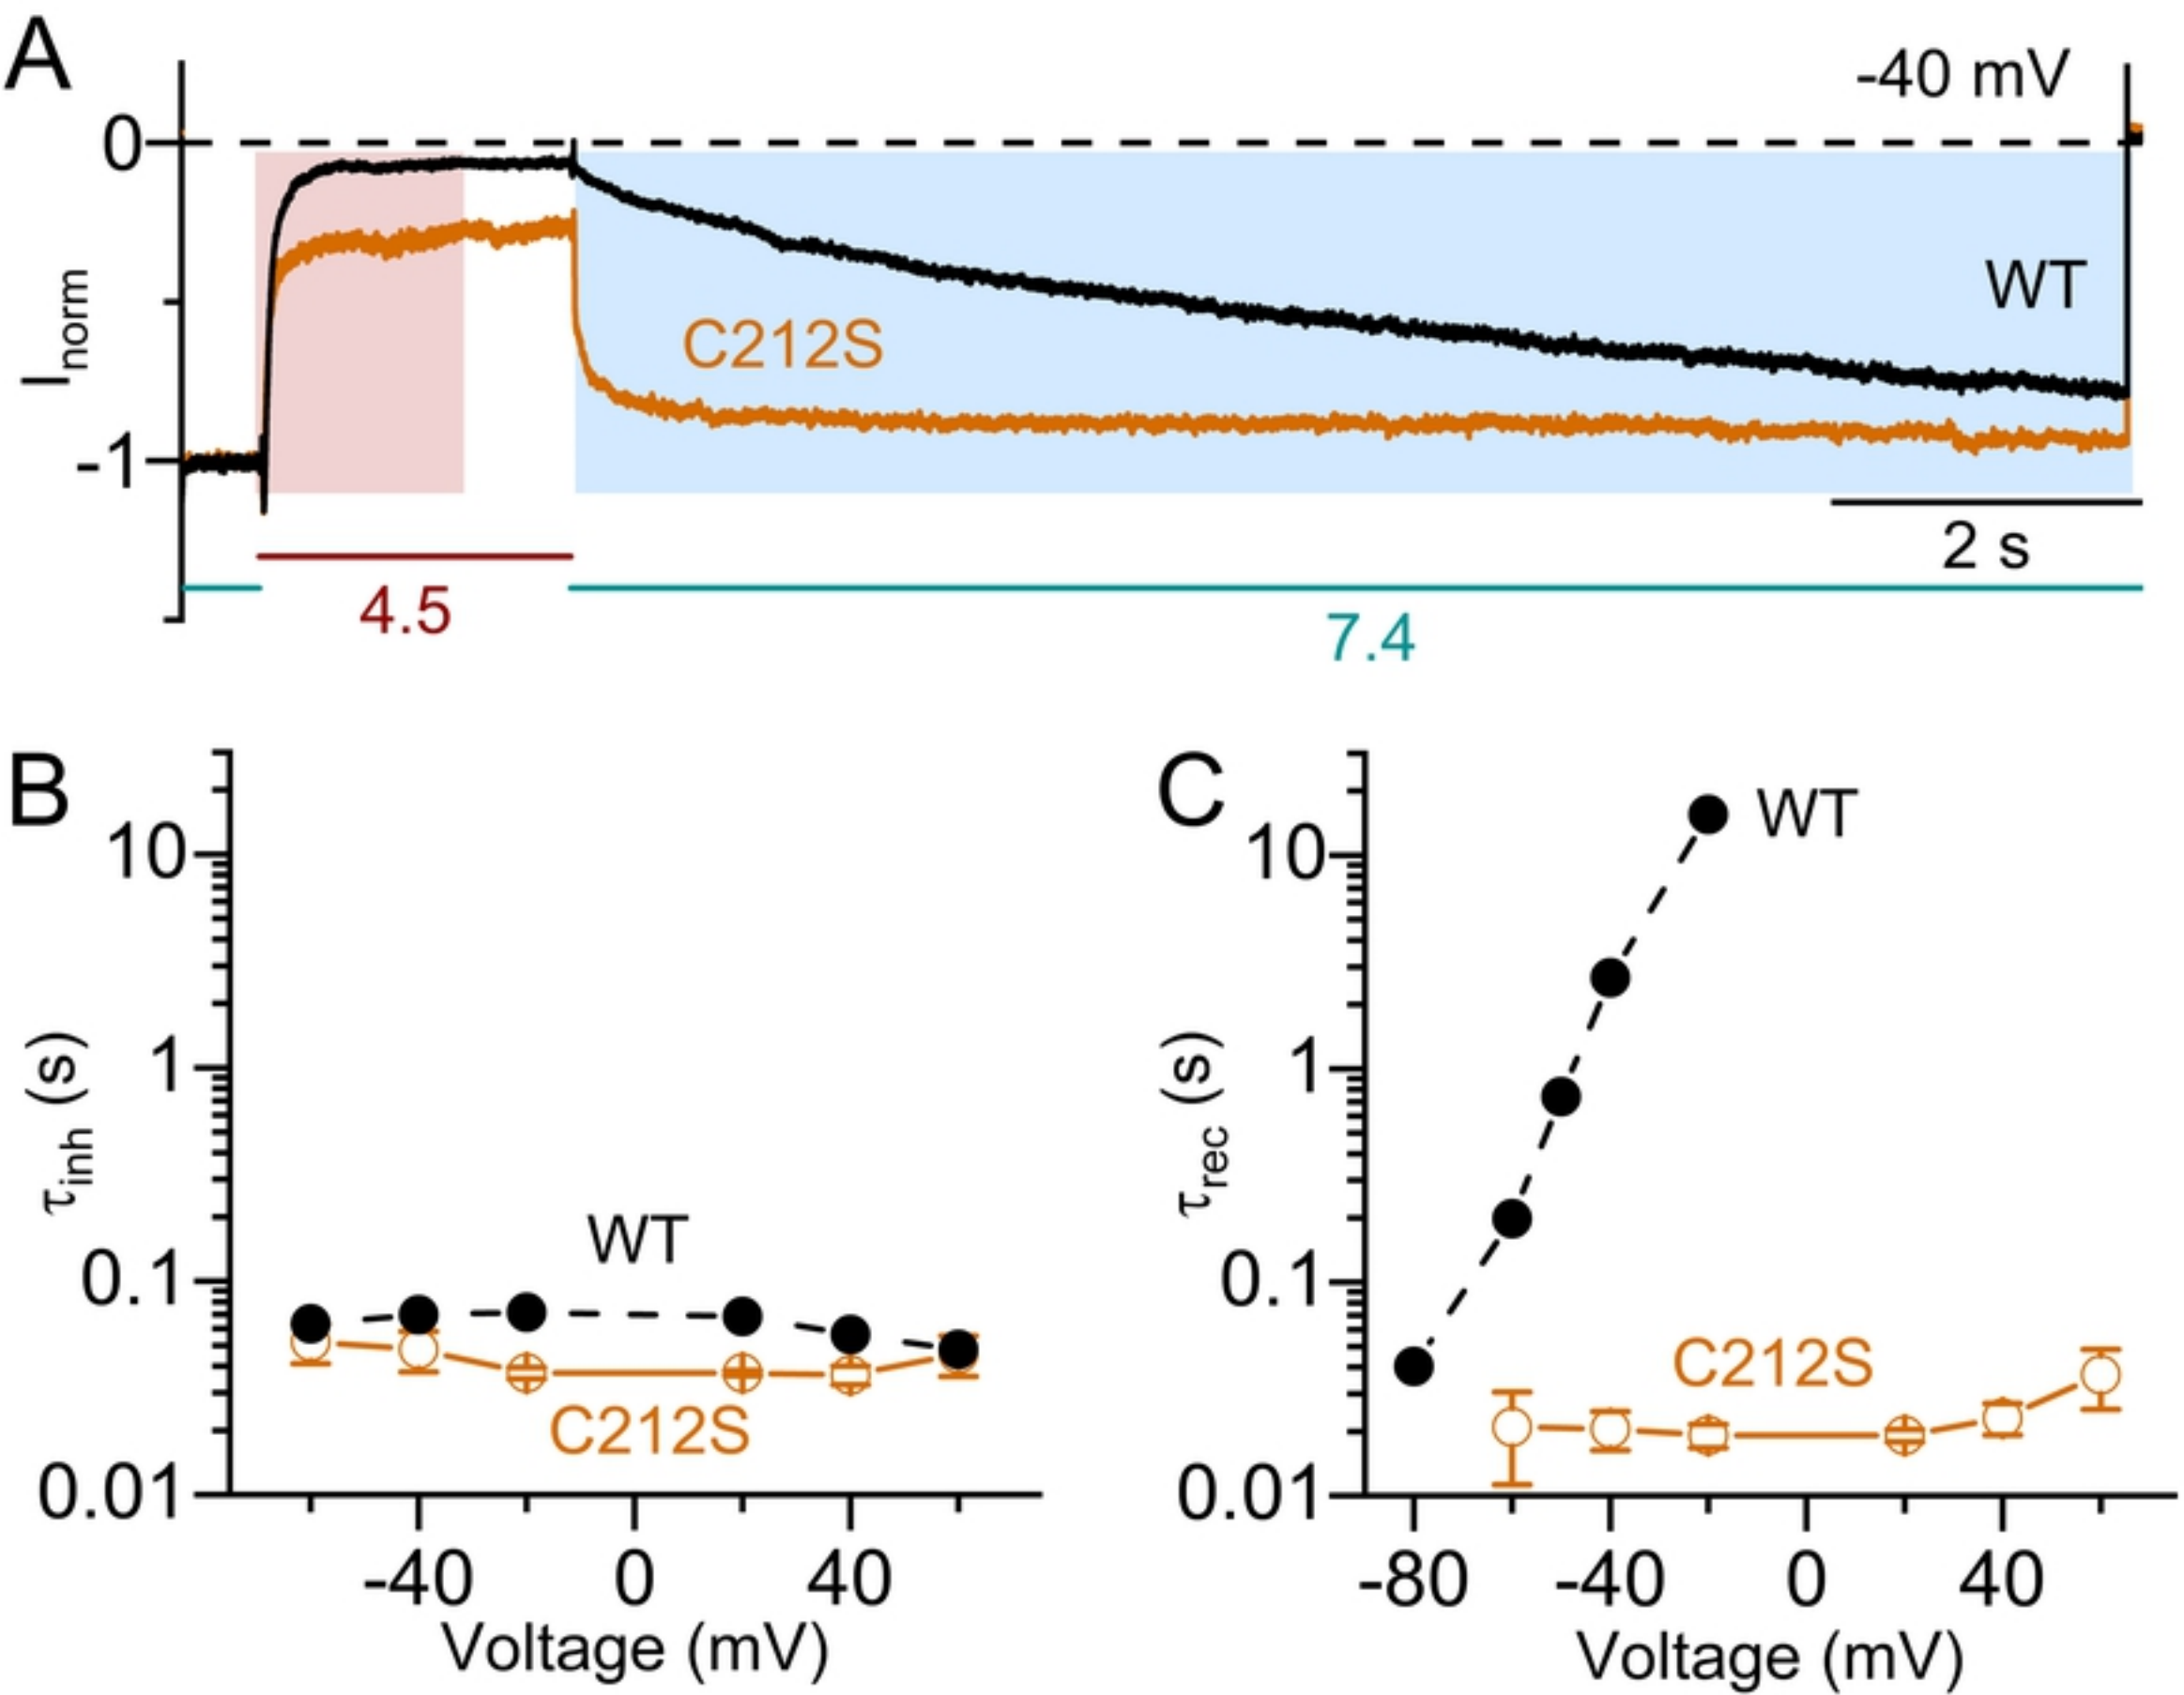

Figure 8



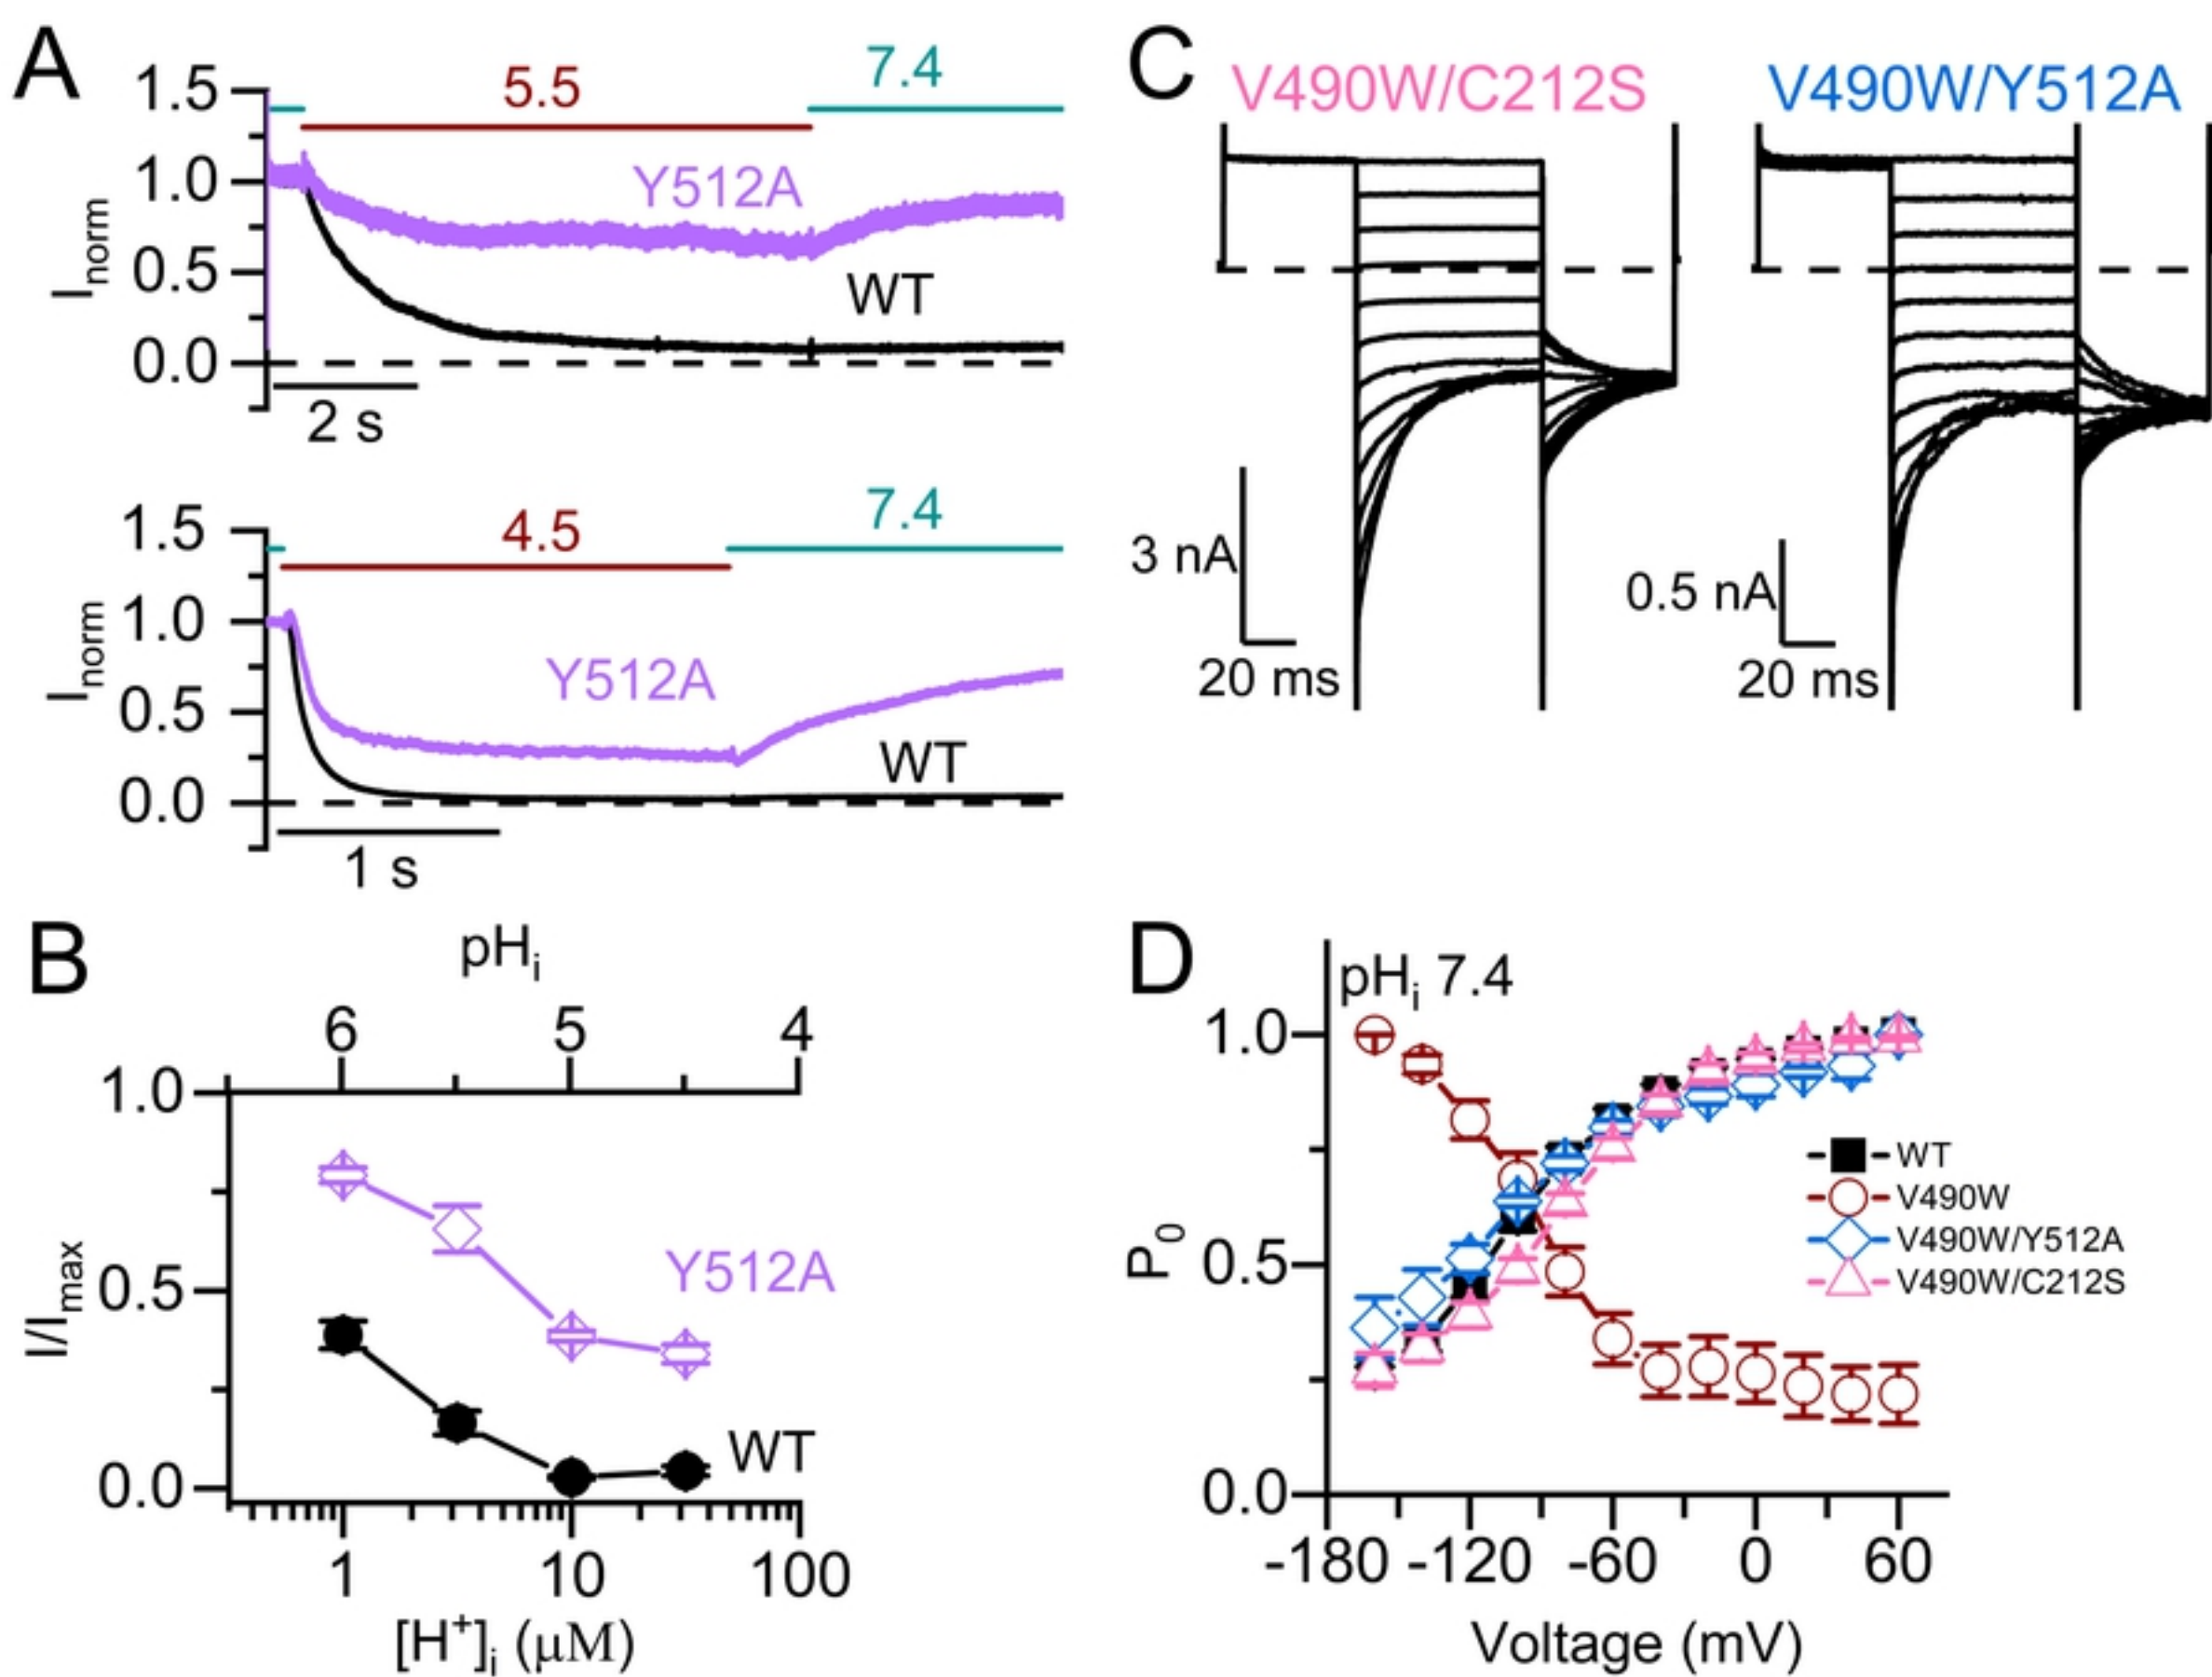

Figure 9
